1     **Water column stability as an important factor controlling**  
2     **nitrite-dependent anaerobic methane oxidation in stratified**  
3                     **lake basins**

4  
5             Guangyi Su<sup>1\*</sup>, Moritz F. Lehmann<sup>1</sup>, Jana Tischer<sup>1</sup>, Yuki Weber<sup>1,2</sup>, Jean-Claude  
6                     Walser<sup>3</sup>, Helge Niemann<sup>1,4</sup>, Jakob Zopfi<sup>1</sup>

7  
8             <sup>1</sup> Department of Environmental Sciences, University of Basel, Basel, Switzerland

9             <sup>2</sup> Present address: Greenlight Biosciences Inc. Medford, MA, USA

10            <sup>3</sup> Genetic Diversity Centre (GDC), ETH Zürich, Zürich, Switzerland

11            <sup>4</sup> Present address: Department of Marine Microbiology and Biogeochemistry, NIOZ Royal Institute for  
12            Sea Research and Utrecht University, Texel, The Netherlands

13

14            \* Corresponding author: [guangyi.su@unibas.ch](mailto:guangyi.su@unibas.ch)

15

## 16 **Abstract**

17 Anaerobic oxidation of methane (AOM) with nitrate/nitrite as the terminal  
18 electron acceptor may play an important role in mitigating methane emissions from  
19 lacustrine environments to the atmosphere. We investigated AOM in the water  
20 column of two connected but hydrodynamically contrasting basins of a south-alpine  
21 lake in Switzerland (Lake Lugano). The North Basin is permanently stratified with  
22 year-round anoxic conditions below 120 m water depth, while the South Basin  
23 undergoes seasonal stratification with the development of bottom water anoxia during  
24 summer. We show that below the redoxcline of the North Basin a substantial fraction  
25 of methane was oxidized coupled to nitrite reduction by *Candidatus*  
26 *Methylomirabilis*. Incubation experiments with  $^{14}\text{CH}_4$  and concentrated biomass from  
27 showed at least 43-52%-enhanced AOM rates with added nitrate/nitrite as electron  
28 acceptor. Multiannual time series data on the population dynamics of *Candidatus*  
29 *Methylomirabilis* in the North Basin following an exceptional mixing event in  
30 2005/2006 revealed their requirement for lasting stable low redox-conditions to  
31 establish. In the South Basin, on the other hand, we did not find molecular evidence  
32 for nitrite-dependent methane oxidizing bacteria. Our data suggest that here the  
33 dynamic mixing regime with fluctuating redox conditions is not conducive to the  
34 development of a stable population of relatively slow-growing *Candidatus*  
35 *Methylomirabilis*, despite a hydrochemical framework that seems more favorable for  
36 nitrite-dependent AOM than in the North Basin. We predict that the importance of N-  
37 dependent AOM in freshwater lakes will likely increase in future because of longer  
38 thermal stratification periods and reduced mixing caused by global warming.

39

## 40 **Introduction**

41 Freshwater habitats such as lakes are important sources of methane ( $\text{CH}_4$ ), a  
42 potent greenhouse gas in the atmosphere (Bastviken et al. 2011). A large fraction of  
43 methane is produced in lake sediments by anaerobic methanogenic archaea, from  
44 where it may escape by ebullition or diffusion into bottom waters. Several studies  
45 have evidenced aerobic methane oxidation at the sediment surface or in the water  
46 column of lakes (He et al. 2012; Bles et al. 2014a; b; Milucka et al. 2015; Oswald et  
47 al. 2016). Within sediments or anoxic bottom waters methane may also be oxidized  
48 anaerobically. At least in the marine realm anaerobic oxidation of methane (AOM) is

49 an important process mitigating methane emissions to the atmosphere (Knittel and  
50 Boetius 2009), and is mainly performed by microbial consortia of anaerobic  
51 methanotrophic archaea (ANME-1, -2 and -3) and sulfate-reducing bacteria (SRB)  
52 (Boetius et al. 2000; Michaelis et al. 2002; Orphan et al. 2002; Niemann et al. 2006).  
53 Recent studies have reported other potential electron acceptors for AOM, including  
54 nitrogenous compounds (Raghoebarsing et al. 2006; Ettwig et al. 2010; Haroon et al.  
55 2013), iron and/or manganese (Beal et al. 2009; Sivan et al. 2011; Ettwig et al. 2016;  
56 Cai et al. 2018), and possibly humic substances (Scheller et al. 2016; Valenzuela et al.  
57 2019).

58 Particularly in freshwater environments, AOM with electron acceptors other than  
59 sulfate may represent a significant methane sink (Sivan et al. 2011; Norði et al. 2013;  
60 Segarra et al. 2015; Weber et al. 2017; Su et al. 2020). For nitrogen-dependent  
61 anaerobic oxidation of methane (N-AOM), two different modes have been identified:  
62 The bacterial oxidation of methane with nitrite as terminal electron acceptor by  
63 *Candidatus* *Methylomirabilis oxyfera* (Ettwig et al. 2009; He et al. 2016;  
64 Versantvoort et al. 2018), where oxygen is produced intracellular disproportionation  
65 of nitric oxide to nitrogen and oxygen, which is then used for intra-aerobic methane  
66 oxidation (Ettwig et al. 2010). Secondly, true anaerobic oxidation of methane coupled  
67 to nitrate reduction, catalyzed by the methanotrophic archaeon *Candidatus*  
68 *Methanoperedens nitroreducens* (Haroon et al. 2013). Although the exact metabolic  
69 mechanisms of nitrate/nitrite-dependent AOM are not entirely elucidated, evidence  
70 for this process has been recently found in freshwater environments (Ettwig et al.  
71 2009; Hu et al. 2009, 2014; Deutzmann and Schink 2011; Wang et al. 2012; Norði  
72 and Thamdrup 2014; Graf et al. 2018; Mayr et al. 2020) but also in marine oxygen  
73 minimum zones (Padilla et al. 2016).

74 Given the prevalence of nitrate in freshwater lakes, N-AOM may play an  
75 important role in the mitigation of methane emissions from lake sediments. In  
76 lacustrine environments, highest methane oxidation rates were often observed near  
77 oxic/anoxic transition zones at the sediment-water interface (Lidstrom and Somers  
78 1984; Kuivila et al. 1988; Frenzel et al. 1990; Bender and Conrad 1994; He et al.  
79 2012) or in the water column of stratified lakes (Rudd et al. 1974; Bles et al. 2014a,  
80 b). However, methane consumption at these boundaries was usually thought to be  
81 carried out by aerobic methanotrophs, fueled by oxygen supplied by diffusion, cryptic  
82 production, or intrusion events (Hanson and Hanson 1996; Bastviken et al. 2002;

83 Pasche et al. 2011; He et al. 2012; Milucka et al. 2015; Oswald et al. 2016). Indeed,  
84 redox transition zones may also represent sites where nitrate/nitrite is typically  
85 produced/regenerated through the oxidation of ammonium and reduction of nitrate by  
86 nitrogen-transforming microorganisms (Kuypers et al. 2018). Hence, here the N-  
87 AOM might be masked by, or misinterpreted as, aerobic methane oxidation  
88 (Deutzmann et al. 2014). As a result, methane oxidation with nitrate/nitrite as terminal  
89 electron acceptor may play a greatly underappreciated role in lakes. While nitrate-  
90 dependent *Ca. Methanoperedens* has not been observed in a freshwater lake (Su et al.  
91 2020), high abundance as well as transcriptional activity of nitrite-dependent *Ca.*  
92 *Methylomirabilis limnetica* has been recently reported in two permanently stratified  
93 lakes (Graf et al. 2018; Mayr et al. 2020). However, the ecology, and more  
94 importantly, the role of these denitrifying methane oxidizers may play in the  
95 lacustrine methane and nitrogen cycles still remain largely unknown.

96 In this study, we investigated methanotrophy in the anoxic waters of two main  
97 basins of Lake Lugano. Previous studies in this lake were mostly concerned with  
98 aerobic methane oxidation, and highlighted the prominent role of Type I  
99 methanotrophs near the redoxcline in the North Basin (Blees et al., 2014a), but also in  
100 the seasonal formation of a benthic nepheloid layer in the South Basin (Blees et al.  
101 2014b). The data on the potential of AOM in the water column particularly of the  
102 North Basin remained ambiguous because potential methane oxidation rate maxima  
103 were found below the oxycline (Blees et al. 2014a). Here, we aimed at further  
104 elucidating the mode of methane oxidation (in particular the scope for true AOM),  
105 and the environmental factors that control the occurrence, growth, and activity of  
106 methanotrophs in the two contrasting lake basins. Lake Lugano is an excellent setting  
107 where to investigate the physico-chemical controls on AOM as a function of  
108 ecosystem dynamics, because the two hydrologically connected lake basins differ  
109 significantly in their mixing regimes, water column-stability, and hence redox  
110 conditions. We quantified methane oxidation rates in the water column of the two  
111 basins, performed incubation experiments to determine the effectiveness of different  
112 electron acceptors (nitrate, nitrite and sulfate) for AOM, and used 16S rRNA  
113 amplicon sequencing to identify key taxa of aerobic and anaerobic methanotrophic  
114 guilds. We demonstrate that *Ca. Methylomirabilis* is an important microbial player in  
115 anaerobic oxidation of methane in the North Basin. Moreover, archived DNA samples  
116 allowed us to track the population dynamics of *Ca. Methylomirabilis* and other

117 methanotrophs in the years following an exceptional mixing event in 2005 and 2006.

118

## 119 **Materials and methods**

120 **Site Description and Sampling.** Lake Lugano is located at the Swiss-Italian border  
121 and consists of two hydrodynamically contrasting basins that are separated from each  
122 other by a shallow sill. The eutrophic 95m-deep South Basin undergoes seasonal  
123 stratification with the development of a benthic “bacterial” nepheloid layer and anoxia  
124 during summer and fall (Lehmann et al. 2004). The 288m-deep North Basin is  
125 permanently stratified, and a chemocline at about 100-130 m separates the oxic  
126 mixolimnion from the anoxic monimolimnion (Blees et al 2014a). The permanent  
127 stratification since the 1960’s was interrupted by exceptional mixing of the whole  
128 water column occurred in 2005 and 2006 due to cold and windy winters, causing the  
129 transient oxygenation of the monimolimnion (Holzner et al. 2009; Lehmann et al.  
130 2015).

131 Water samples were collected in late November 2016, in the center of the  
132 southern basin off Figino (45°57’N, 8°54’E), and off Gandria in the northern basin  
133 (46°06’N, 9°12’E). Oxygen concentrations were measured using a conductivity,  
134 temperature and depth (CTD) probe (Idronaut Ocean Seven 316 Plus). Water samples  
135 from distinct depths were collected using 5L-Niskin bottles, and subsamples were  
136 taken directly from the Niskin bottle and filtered (0.45 µm) and/or processed as  
137 outlined below. Water samples for methane oxidation potential measurements were  
138 collected in 20 mL glass vials, which were filled carefully through the tubing,  
139 allowing water to overflow for about 2-3 volumes. The bottles were filled completely  
140 and care was taken not to introduce any air bubbles. The vials were crimp-sealed  
141 with Br-butyl rubber stoppers (Niemann et al. 2015). Samples for methane  
142 concentration measurements were collected in 120 mL serum bottles, crimp sealed  
143 with thick butyl rubber stoppers (Niemann et al. 2015) and a 20 mL headspace was  
144 created before fixing the sample by adding 5 mL of 20% NaOH.

145

146 **Analytical Methods.** Methane concentrations in the headspace of NaOH-fixed water  
147 samples were measured using a gas chromatograph (GC, Agilent 6890N) with a flame  
148 ionization detector and He as a carrier gas (Blees et al 2014b). Ammonium (NH<sub>4</sub><sup>+</sup>)  
149 concentrations were determined colorimetrically using indophenol reaction, and

150 nitrite ( $\text{NO}_2^-$ ) using Griess reagent (Hansen and Koroleff (1999).  $\text{NO}_x$  (nitrate plus  
151 nitrite) was determined using a  $\text{NO}_x$ -Analyzer (Antek Model 745). Nitrate ( $\text{NO}_3^-$ )  
152 concentrations were calculated from the difference between  $\text{NO}_x$  and  $\text{NO}_2^-$ . Filtered  
153 samples for sulfide (i.e. the sum of  $\text{H}_2\text{S}$ ,  $\text{HS}^-$  and  $\text{S}^{2-}$ ) concentration determination  
154 were stabilized immediately after sampling with zinc acetate and analyzed in the  
155 laboratory photometrically (Cline 1969). Sulfate was analyzed by ion chromatography  
156 (881 IC compact plus pro, Metrohm, Switzerland). Water samples for dissolved iron  
157 ( $\text{Fe}^{2+}$ ) and manganese ( $\text{Mn}^{2+}$ ) were fixed with HCl (0.5 M final. conc) after filtration  
158 through a 0.45  $\mu\text{m}$  membrane filter, and analyzed using inductively coupled plasma  
159 optical emission spectrometry (ICP-OES). Total Fe and Mn concentrations  
160 (unfiltered) were measured. Concentrations of  $\text{Fe}^{2+}$  were additionally determined  
161 photometrically using the ferrozine assay (Stookey 1970). Particulate iron was  
162 calculated from the difference between the total  $\text{Fe}^{2+}$  concentrations after reduction  
163 with hydroxylamine, and the dissolved  $\text{Fe}^{2+}$  in the filtered sample.

164

165 **Methane oxidation rate (MOR) measurements.** In situ methane oxidation rates  
166 were determined with trace amounts of tritium-labeled methane ( $^3\text{H-CH}_4$ ) (Steinle et  
167 al. 2015). Upon the retrieval of water samples, 5  $\mu\text{L}$  anoxic  $^3\text{H-CH}_4$  solution (~1.8  
168 kBq) was injected into the 20 mL bubble-free glass vials and samples were incubated  
169 in the dark at 4 °C for 42 h. To terminate incubations, 2 mL water samples were  
170 directly transferred into 6 mL scintillation vials, mixed with 2 mL of a scintillation  
171 cocktail (Ultima Gold, PerkinElmer) and immediately measured for total radioactivity  
172 of  $^3\text{H}$ . 10 mL samples were then taken and transferred into 20 mL scintillation vials  
173 containing 1 mL saturated NaCl solution. After stripping the remaining radio-labeled  
174 methane from the vials for 30 min, samples were mixed with 8 mL of the scintillation  
175 cocktail prior to  $^3\text{H}_2\text{O}$  radioactivity measurement via liquid scintillation counting  
176 (2200CA Tri-Carb Liquid Scintillation Analyzer). Methane oxidation rates (*MOR*)  
177 were calculated according to Eq. 1.

178 
$$\text{MOR} = [\text{CH}_4] \times \frac{A_{\text{H}_2\text{O}}}{A_{\text{H}}} \times t^{-1} \quad (\text{Eq. 1})$$

179 Where  $A_{\text{H}}$  and  $A_{\text{H}_2\text{O}}$  represent the radioactivity of total  $^3\text{H}$  and  $^3\text{H}_2\text{O}$  from methane  
180 oxidation, respectively,  $[\text{CH}_4]$  is the methane concentration in the water column  
181 sample, and  $t$  the incubation time.

182

183 **Incubation experiments with <sup>14</sup>C-labelled methane.** We used microbial biomass  
184 from anoxic water layers of both basins to test different electron acceptors for their  
185 potential to stimulate anaerobic methane oxidation. Briefly, the biomass of a 500 mL  
186 water sample was collected on a glass fiber filter, which was then transferred to a 120  
187 mL serum bottle containing 100 mL anoxic artificial lake water. The bottles were  
188 subsequently purged with nitrogen until the oxygen concentrations in the control  
189 bottles, equipped with trace oxygen sensor spots (TROXSP5, Pyroscience), were  
190 below the detection limit (0.1 μM). Under an N<sub>2</sub>-atmosphere in an anaerobic  
191 chamber, potential electron acceptors, i.e., nitrate, nitrite, and sulfate, were added  
192 from anoxic stock solutions to a final concentration of 4 mM, 4 mM, and 2 mM,  
193 respectively. Molybdate, a specific inhibitor of dissimilatory sulfate reduction, was  
194 added to some incubations (4 mM final concentration) to test for sulfate-dependent  
195 anaerobic methane oxidation. After these additions, the bottles were filled headspace-  
196 free with anoxic artificial medium, and closed with grey stoppers. The stoppers had  
197 been heated in boiled water, and were stored in a Schott bottle with Helium to remove  
198 dissolved oxygen in the elastomer. Finally, 10 μL of <sup>14</sup>CH<sub>4</sub> tracer were injected, and  
199 samples were incubated at 25 °C. To exclude potential oxygen contamination during  
200 the long incubation time, the closed incubation bottles were kept permanently under  
201 N<sub>2</sub>-atmosphere in an anaerobic chamber. Both live controls (without added electron  
202 acceptors) and base-killed controls (pH >13) were treated in the same way and  
203 incubated in parallel for the two basins. At the end of the incubation, 20 mL of  
204 headspace was created by exchanging the medium with N<sub>2</sub> gas. Biological activity  
205 was stopped by adding 5 mL saturated NaOH solution (50% w/w). The radioactivity  
206 of residual <sup>14</sup>CH<sub>4</sub> (combusted to produce <sup>14</sup>CO<sub>2</sub>), <sup>14</sup>CO<sub>2</sub> produced by methane  
207 oxidation, and radioactivity in the remaining samples was determined by liquid  
208 scintillation counting (e.g., Bles et al. 2014b). The first order rate constants (*k*) were  
209 calculated according to Eq. 2.

210 
$$k = \frac{A_{CO_2} + A_R}{A_{CH_4} + A_{CO_2} + A_R} \times t^{-1} \quad (\text{Eq. 2})$$

211 Where  $A_{CH_4}$ ,  $A_{CO_2}$ , and  $A_R$  represent the radioactivity of methane, carbon dioxide, and  
212 the remaining radioactivity, respectively.  $t$  represents the incubation time. Methane  
213 oxidation rates (MOR) were calculated using the value for  $k$  and the methane  
214 concentration at the start of the incubation (Eq. 3).

215 
$$\text{MOR} = k \times [\text{CH}_4] \quad (\text{Eq. 3})$$



216

217 **DNA extraction, PCR amplification, Illumina sequencing and data analysis.**

218 Water samples from different depths of the two basins were collected and sterile-  
219 filtered for biomass using 0.2 µm polycarbonate membrane filters (Cyclopore,  
220 Whatman). Biomass DNA was then extracted using FastDNA SPIN Kit for soil (MP  
221 Biomedicals) following the manufacturer's instructions. A two-step PCR approach  
222 (Monchamp et al. 2016) was applied in order to prepare the library for Illumina  
223 sequencing at the Genomics Facility Basel. Briefly, 10 ng of extracted DNA were  
224 used for a first PCR using universal primers 515F-Y (5'-  
225 GTGYCAGCMGCCGCGGTAA) and 926R (5'-CCGYCAATTYMTTTRAGTTT-3')  
226 targeting the V4 and V5 regions of the 16S rRNA gene (Parada et al. 2016). The  
227 primers of the first PCR were composed of the target region and an Illumina Nextera  
228 XT specific adapter sequence. Four sets of forward and reverse primers, which  
229 contained 0-3 additional and ambiguous bases after adapter sequence, were used in  
230 order to introduce frame shifts to increase complexity (see Table S1 in the Supporting  
231 Information). Sample indices and Illumina adaptors were added in a second PCR of 8  
232 cycles. Purified, indexed amplicons were finally pooled at equimolar concentration,  
233 denatured, spiked with 10% PhiX, and sequenced on an Illumina MiSeq platform  
234 using the 2×300 bp paired-end protocol (V3-Kit). After sequencing, quality of the raw  
235 reads was checked using FastQC (v 1.2.11; Babraham Bioinformatics). FLASH  
236 (Magoč and Salzberg 2011) was used to merge forward and reverse reads into  
237 amplicons of about 374 bp length with an average merging rate of 96%, allowing a  
238 minimum overlap of 15 nucleotides and a mismatch density of 0.25. Full-length  
239 primer regions were trimmed using USEARCH (v10.0.240), allowing a maximum of  
240 one mismatch. In a next step, the merged and primer-trimmed amplicons were  
241 quality-filtered (size range: 250-550, no ambiguous nucleotides, minimum average  
242 quality score of 20) using PRINSEQ (Schmieder and Edwards 2011). Clustering into  
243 operational taxonomic units (OTU) was done at a 97% identity threshold using the  
244 UPARSE-OTU algorithm in USEARCH v10.0.240 (Edgar 2010, 2013). Taxonomic  
245 assignment of OTUs was done using SINTAX (Edgar, 2016) and the SILVA 16S  
246 rRNA reference database v128 (Quast et al. 2013). Downstream sequence analysis  
247 was done in R v3.5.1 using Phyloseq v1.25.2 (McMurdie and Holmes 2013) as  
248 detailed in the supporting information (see supplementary method). Phylogenetic  
249 analysis of specific partial 16S rRNA gene sequences was performed in Mega 7



250 (Kumar et al. 2016) using the neighbor-joining method (Tamura et al. 2004), and the  
251 robustness of tree topology was tested by bootstrapping (1000 replicates).

252

253 **Quantitative PCR (qPCR).** The abundance of *Ca. Methylomirabilis* was quantified  
254 using the primers qP1F (5'-GGGCTTGACATCCCACGAACCTG-3') and qP1R (5'-  
255 CGCCTTCCTCCAGCTTGACGC-3') amplifying positions 1001 to 1201 of 16S  
256 rRNA gene (Ettwig et al. 2009). qPCR reactions of all DNA samples were performed  
257 using the SensiFAST SYBR No-ROX Kit (Bioline) on a Mic (Magnetic Induction  
258 Cyclor) real time PCR machine (BMS, Bio Molecular Systems, Australia). An initial  
259 denaturing step of 95 °C for 3 min was followed by 40 cycles of 5 s at 95 °C, 10 s at  
260 65 °C, and 15 s at 72 °C. The specificity of the amplification was assessed by  
261 examining the melting curves from 60 °C to 95 °C, by agarose gel electrophoresis and  
262 sequencing. The calibration curves were generated using serial dilutions of pGEM-T  
263 Easy plasmid DNA (Promega, USA) carrying a single copy of the target gene  
264 fragment (qp1F/qp1R). Standard curves with these clones had a slope of -3.44, an R<sup>2</sup>  
265 of 0.994, and an amplification efficiency of 95%. The number of gene copies in  
266 plasmid DNA was calculated using the equation reported previously (Ritalahti et al.  
267 2006).

268

## 269 **Results and Discussion**

### 270 **Hydrochemistry and methane oxidation in the water column of Lake Lugano.**

271 The water column of the deep North Basin (NB) was permantly stratified during  
272 the sampling year 2016 and oxygen concentrations decreased with depth and fell  
273 below the detection limit (1 µM) at 95 m depth. The redoxcline was defined between  
274 depth of oxygen starting to drop below 5 µM and depth of first occurrence of sulfide  
275 (Fig. 1A and S3). Methane concentrations increased linearly from redoxcline to 20  
276 µM at 155 m, at depths where nitrite was below the limit of detection (0.02 µM) and  
277 nitrate were in the low micromolar range (< 1 µM, Fig. 1B). Below the redoxcline or  
278 in the anoxic water, concentrations of other reduced compounds such as sulfide,  
279 ammonium and dissolved Fe<sup>2+</sup> rose above their background concentrations and  
280 increased continuously with water depth (Fig. S3). In the seasonally stratified South  
281 Basin (SB), the benthic nepheloid layer (NBL) started during summer and was fully  
282 developed in October. This turbid oxygen-depleted layer extends from the lake

283 ground up to the chemocline, consists of microbial biomass, produced locally in large  
284 parts by methanotrophs (Blees et al. 2014b). During the sampling time in the southern  
285 basin, concentrations of oxygen decreased with depth and methane concentrations  
286 increased remarkably to 28  $\mu\text{M}$  in the bottom water (Fig. 2A). Sulfide was below  
287 detection at all depths and the redoxcline was defined between depth at which oxygen  
288 drops below 5  $\mu\text{M}$  and depth of first occurrence of reduced compounds such as  
289 dissolved  $\text{Fe}^{2+}$  (Fig. S4). The anoxic hypolimnia below redoxcline were characterised  
290 by considerable amounts of nitrate (38-70  $\mu\text{M}$ ), with low concentrations of nitrite  
291 (1.2-3.9  $\mu\text{M}$ ) (Fig. 2B). Similar to the northern basin, ammonium accumulated in  
292 anoxic water column and increased with depth. Particular Fe reached up to 9.1  $\mu\text{M}$   
293 close to surface sediment and Mn species were present below the redoxcline (Fig. S4).  
294 Sulfate was relatively abundant and remained mostly above 100  $\mu\text{M}$  below the  
295 redoxclines of both basins.

296 To quantify methane oxidation in the water column of Lake Lugano, we  
297 performed incubation experiments with  $^3\text{H}\text{-CH}_4$  to determine in situ rates of methane  
298 oxidation across the redoxclines particularly in the anoxic waters of both basins. In  
299 the NB, methane oxidation was occurring across and mostly below the redoxcline  
300 with two peaks observed (Fig. 1C). The first peak of methane oxidation ( $0.06 \pm 0.01$   
301  $\mu\text{mol L}^{-1} \text{d}^{-1}$ ) was at 100 m, right below the redoxcline, and aerobic methane oxidation  
302 was the most likely cause for this observed peak (Blees et al. 2014a). However,  
303 methane oxidation continued into the lower, anoxic parts of chemocline, and a  
304 secondary rate maximum of  $0.08 \pm 0.07 \mu\text{mol L}^{-1} \text{d}^{-1}$  was detected at 125 m. A similar  
305 bimodal pattern has also been observed before, albeit the two separate peaks and the  
306 oxycline were located at greater depths (Blees et al. 2014a). In contrast, we found a  
307 similar increase in methane oxidation rates across the redoxcline in the SB, with the  
308 highest rates of  $0.18 \pm 0.1 \mu\text{mol L}^{-1} \text{d}^{-1}$  observed within the redoxcline at 70 m (Fig.  
309 2C). Although Type I methane-oxidizing bacteria (MOB) were shown to dominate the  
310 biomass in the BNL of SB, where the highest methanotrophic activity was observed  
311 (Blees et al. 2014a), it remained unclear whether the observed activity was solely due  
312 to these aerobic methanotrophs. The presence of both nitrate/nitrite and sulfate in the  
313 BNL bears the potential that methane could also be oxidized anaerobically with either  
314 of these oxidants.

315 Methane oxidation within oxic-anoxic transition zones of other meromictic lakes  
316 was often attributed to aerobic methanotrophs (Biderre-Petit et al. 2011; Oswald et al.

317 2016). In lakes with shallow redox transition zones (RTZs), cryptic oxygen  
318 production by phototrophs could sustain aerobic methane oxidation even in seemingly  
319 anoxic waters (Oswald et al. 2015; Milucka et al. 2015). At the depths of the RTZs in  
320 Lake Lugano, particularly in the NB, oxygen production by phototrophs is an  
321 unlikely mechanism. Alternatively, Bles et al. (2014b) suggested that aerobic  
322 methane oxidizers can survive prolonged periods of oxygen starvation, and can  
323 resume high MOx activity upon episodic downwelling of oxygen, for example during  
324 cooling events. Yet potential mechanisms that inject oxygen to the deep hypolimnion  
325 were not investigated and it remains speculative if and how deep such events occur.  
326 Thus, methane oxidation far below the redoxcline in Lake Lugano North Basin may  
327 indeed be anaerobic, and nitrate/nitrite and sulfate may serve as potential oxidants for  
328 anaerobic methane oxidation.

329

### 330 **Evidence for nitrate/nitrite-dependent AOM**

331 To test for the presence of active anaerobic methanotrophs, and to identify the  
332 potential oxidants for methane oxidation, we set up anoxic incubation experiments  
333 with  $^{14}\text{CH}_4$  as substrate, different electron acceptors (i.e., nitrate, nitrite and sulfate),  
334 and concentrated biomass. The biomass was collected from 85-90 m in the South  
335 Basin, a depth well below the RTZ, but where nitrate, nitrite, and sulfate were present.  
336 Biomass from the North Basin was collected at 105-110 m, below the RTZ where  
337 nitrite was undetectable but nitrate (low) and sulfate were still available.

338 With biomass from water column right below the redoxcline of the meromictic  
339 NB, we found that both nitrate and nitrite stimulated AOM rates considerably (Fig. 3).  
340 Compared to the control experiments (i.e., no electron acceptor added), AOM rates  
341 increased by 52% (16 days,  $54.8 \pm 15.2 \mu\text{mol L}^{-1} \text{d}^{-1}$ ) and 72% (32 days,  $60.8 \pm 5.9$   
342  $\mu\text{mol L}^{-1} \text{d}^{-1}$ ) in the presence of nitrate, and by 43% after 16 days ( $51.5 \pm 6.3 \mu\text{mol L}^{-1}$   
343  $\text{d}^{-1}$ ) and 44% after 32 days ( $50.4 \pm 15.8 \mu\text{mol L}^{-1} \text{d}^{-1}$ ) when nitrite was added.  
344 However, methane oxidation was not enhanced by the addition of sulfate compared to  
345 controls and there were no significant differences between the controls and  
346 amendments with sulfate of both the 16-day and 32-day incubations (Table S4). In  
347 addition, AOM rates were not significantly different between incubation bottles with  
348 sulfate and molybdate (Table S4). With respect to incubations with biomass from the  
349 anoxic water of the SB, no significant stimulation of methane oxidation was observed  
350 for all the treatments with added electron acceptors relative to the live controls after

351 16 days (Fig. 3 and Table S4). These results suggest that the oxidation of methane  
352 was not driven by any of the electron acceptors, and in turn, that AOM was likely not  
353 a major mode of methane removal in the South Basin, in spite of the presence of  
354 nitrate, nitrite and sulfate in the water column. Interestingly, after 32 days of  
355 incubation, the methane oxidation rates in all incubations were higher than after 16  
356 days, independently of the added compounds, including molybdate, a known inhibitor  
357 of sulfate-reduction and thus of sulfate-dependent AOM (Wilson and Bandurski  
358 1958).

359         Puzzling at first was the observation that we measured significant AOM rates in  
360 all live controls (both NB and SB), in the absence of any additional electron acceptors.  
361 Ambient concentrations of nitrate and nitrite were below the detection limit, but  
362 ambient sulfate was likely still present, which could explain the anaerobic oxidation  
363 of methane to some extent. However, the fact that no significant difference between  
364 sulfate- and molybdate-amended incubations was observed in all cases (Table S4)  
365 allows us to exclude any significant role of sulfate-dependent AOM in the live  
366 controls. One possibility inferred from the incubation experiments particularly in the  
367 SB was that the methanotrophs in the concentrated biomass oxidized methane with  
368 the particulate Fe and/or Mn oxides (Beal et al. 2009; Ettwig et al. 2016; Cai et al.  
369 2018), which were present in the water column and were concentrated on the filters  
370 together with the biomass (Fig. S3 and S4). In addition, the presence of traces of  
371 oxygen cannot be excluded. Greatest care was taken to avoid any oxygen  
372 contamination during preparation of the incubations and sampling. We did not,  
373 however, add a reducing agent to remove chemically any traces of oxygen. Thus, if  
374 trace amounts of oxygen (<100 nM) were still present in the incubations, they might  
375 be sufficient to serve as substrate for the enzyme methane monooxygenase. After the  
376 oxygen-dependent initial attack of methane, its further transformation could proceed  
377 anaerobically by fermentation, whereby hydrogen, formate acetate, and other  
378 compounds are produced (Kalyuzhnaya et al. 2013). Because short chain fatty acids  
379 are volatile under acidic conditions, radiolabeled formate and acetate could have been  
380 purged from the samples together with CO<sub>2</sub>, and contribute to the measured methane  
381 oxidation rate. This fermentative conversion of methane to excreted organic  
382 compounds by gammaproteobacterial methanotrophs, could represent an important  
383 methane elimination pathway under severe oxygen limitation (Kalyuzhnaya et al.

384 2013) in both the nepheloid layer of the SB and water column below the RTZ of the  
385 NB of Lake Lugano.

386 Although the electron acceptors used for methane oxidation in all live controls  
387 remained to be explored, incubation experiments with biomass from the NB  
388 demonstrated that both nitrate and nitrite played a significant role and enhanced  
389 methane oxidation under anoxic condition, providing evidence for methane oxidation  
390 coupled to nitrate and/or nitrite reduction. Assuming that methane consumption in the  
391 live controls was an effect due to micro-aerobic methane oxidation or metal-  
392 dependent AOM, rates in the nitrite/nitrate amendments beyond the controls (net  
393 consumption) can be attributed to true NO<sub>x</sub>-dependent AOM (N-AOM). Indeed,  
394 nitrate/nitrite-dependent AOM contributed 52-73% and 43% to the overall methane  
395 consumption in nitrate/nitrite-added incubations with water from below the  
396 chemocline in Lake Lugano North Basin, highlighting the potentially large role N-  
397 AOM plays in lacustrine methane cycling.

398

#### 399 **Abundance of diversity of methanotrophic bacteria**

400 Based on 16S rRNA amplicon sequencing using an optimized PCR cycle  
401 (Supplementary method), a total of 4518 OTU's were obtained in the combined  
402 datasets of the South and the North Basin, with a total of 7247 OTU's before  
403 rarefaction (Weiss et al. 2017). Among them, we identified 32 OTU's of potential  
404 methanotrophic bacteria, 23 of which were related to gamma-proteobacterial (Type I)  
405 methanotrophs. One OTU was related to Methyloirababilia, the former NC10 class  
406 (Fig. S5). No evidence of typical anaerobic methane-oxidizing archaea such as *Ca.*  
407 *Methanoperedens* or representatives of the ANME-1, -2 or -3 groups were detected in  
408 any of the samples from the water column of both basins.

409 In the permanently stratified NB, we detected 16S rRNA gene sequences that  
410 were affiliated with *Ca. Methyloirababilia*, which was capable of mediating AOM  
411 with nitrite as terminal electron acceptor (Ettwig et al. 2010). With a relative sequence  
412 abundance of up to 6.7% at 95 m, this single OTU was equally abundant as all  
413 *Methylococcaceae* sequences combined, which accounted for ~5% of total sequences  
414 within or below the redoxcline (Fig. 4 and 5, Nov. 2016). Both *Ca. Methyloirababilia*  
415 and *Methylococcaceae* coexisted in the micro-oxic water column (85-105 m), where  
416 methane consumption rates were high. These observations together with incubation  
417 experiment from the NB suggested that both aerobic and anaerobic methanotrophs

418 were important members of the methanotrophic guild and contributed together to the  
419 efficiency of the pelagic methane filter close to the redoxcline (Fig. 1). However, the  
420 factors facilitating the secondary peak of methane oxidation activity at 125 m (i.e., in  
421 anoxic water) remain uncertain. The lack of evidence for both sulfate or iron-utilizing  
422 anaerobic methanotrophs suggested that this peak was most probably attributed to *Ca.*  
423 *Methylomirabilis* (Fig. S6). Although the abundance of this denitrifying methane  
424 oxidizer did not vary in tandem with AOM rate at that depth (1.5% rel. abundance)  
425 and nitrite concentrations were below the detection limit throughout the water  
426 column, *Ca. Methylomirabilis* may still depend directly on the in-situ production of  
427 nitrite through microaerobic ammonium oxidation or nitrate reduction. Indeed,  
428 relatively high concentrations of ammonium were observed at these depths, and the  
429 abundance of ammonium-oxidizing bacteria (AOB) was peaking at 130 m (0.42%  
430 relative abundance), closed to the depth where the secondary methane oxidation  
431 maximum was observed (Fig. S7B). Oxygen was not detected at this depth, but these  
432 microorganisms could utilize minimal oxygen concentrations (at low nanomolar  
433 levels), which occurred at redoxcline boundaries or through sporadic oxygen  
434 intrusions oxygen and sustained aerobic ammonium oxidation (Thamdrup et al. 2012;  
435 Bristow et al. 2016). Thus, the virtual absence of nitrite was a reflection of the very  
436 efficient consumption rather than a lack of production, which implies that well below  
437 the chemocline of the NB, the nitrite-dependent AOM was likely limited by the nitrite  
438 production processes.

439 By comparison, we were not able to detect any 16S rRNA gene sequences that  
440 belonged to *Ca. Methylomirabilis* in the water column of the seasonally stratified SB,  
441 but only in the surface sediment with a very low relative abundance of 0.0014% of  
442 total sequences (Fig. 4F). The apparent absence of true anaerobic methane oxidizers  
443 was consistent with the lack of any significant stimulation of AOM with nitrate/nitrite  
444 in the incubations with biomass from this basin. However, Type I methane-oxidizing  
445 bacteria or *Methylococcaceae* were dominating the aerobic methanotrophic  
446 community (Fig. 4D), which was in accordance with the previous finding (Blees et al.  
447 2014b). Among the members of *Methylococcaceae* (including *Methylobacter*,  
448 *Methylomonas*, *Methyloglobulus*, *Methylosarcina*, *Methyloparacoccus*,  
449 *Methylocaldum* and *Ca. Methylospira*), *Methylobacter* represented the most abundant  
450 genera, followed by *Crenothrix* (Fig. 4B), which has recently been shown to  
451 contribute to methane oxidation in two other stratified lakes in Switzerland (Oswald



452 et al. 2017). Despite their occurrence in anoxic waters, these gamma-proteobacterial  
453 methanotrophs are considered aerobic methanotrophs, as they use molecular oxygen  
454 for the particulate methane monooxygenase and the initial activation of methane.  
455 Nevertheless, genomes of several aerobic methanotrophs, including *Crenothrix*,  
456 encode putative nitrate (*narG*, *napA*), nitrite (*nirS*, *nirK*), and/or nitrogen oxide  
457 reductases (*norB*) (e.g. Kits et al. 2015; Oswald et al. 2017). *Methylomonas*  
458 *denitrificans*, for example, can couple the oxidation of methane (and methanol) to the  
459 reduction of nitrate to N<sub>2</sub>O, under severe oxygen limitation (Kits et al. 2015). But  
460 oxidation of methane under completely anoxic conditions has neither been shown for  
461 *Crenothrix* nor any other of the gamma-proteobacterial methanotrophs to date. When  
462 comparing the diversity of *Methylococcaceae* in the water column of the two basins,  
463 six out of the total 23 OTU's were shared by both basins, 4 OTU's were observed in  
464 the North Basin only, and 13 in the South Basin only (Fig. S5). Thus, the  
465 methanotrophic guild was more diverse (19 OTUs) in the dynamic water column of  
466 the SB, where oxic and anoxic conditions alternate seasonally.

467 Taken together, the peak activity of methane oxidation at 70 m in the SB was  
468 essentially due to aerobic *Methylococcaceae* (22% rel. abundance) thriving under  
469 hypoxic conditions in the BNL. More importantly, in the NB of Lake Lugano,  
470 methane oxidation within the redoxcline was mediated by both type I MOB and  
471 nitrite-dependent *Ca. Methyloirabilis*. Furthermore, we propose that the observed  
472 methane oxidation in the seemingly anoxic water column was largely attributed to  
473 denitrifying methanotrophs using cryptic nitrite from “nano-aerobic” bacterial  
474 nitrification, but we could not exclude the cryptic aerobic methane oxidation.  
475 Independent of the mode of methane oxidation (aerobic or anaerobic), oxygen appears  
476 as the ultimate and key limiting factor that controls methane oxidation directly (MOx)  
477 or indirectly (nitrite-dependent AOM) in the North Basin. Yet, it remains enigmatic as  
478 to why we see the accumulation of aerobic and nitrite-dependent methanotrophs, and  
479 even more intriguingly a methane turnover rate peak, at a very specific water depth  
480 well below the redoxcline (Fig. 1C).

481

#### 482 **Water column stability as an ecological factor fostering nitrite-dependent** 483 **anaerobic methane oxidation**

484 After ~40 years of permanent meromixis in the North Basin, two exceptionally  
485 strong mixing events in 2005 and 2006 led to a complete oxygenation of the entire



486 water column (Holzner et al. 2009; Lehmann et al. 2015). Thereafter, the water  
487 column re-stabilized rapidly again and remained stratified with anoxia below 125 m  
488 depth (e.g., Wenk et al. 2013). Interestingly, in 2009 the abundance of *Ca.*  
489 *Methylomirabilis* was low around the redoxcline but increased with depth reaching ~5%  
490 of total sequences at 200 m. The vertical mixing brought considerable amounts of  
491 oxygen to the deep water column and resulted in the almost complete oxidation of  
492 ammonium, the produced nitrite and nitrate fueled the growth of *Ca.*  
493 *Methylomirabilis*. Once nitrite was used up, the abundance of this methanotrophic  
494 bacteria started to decrease in the monimolimnion. On the other hand, a new  
495 population of *Ca. Methylomirabilis* started to establish at the RTZ (Fig. 5). Notably,  
496 an upward migration of the redoxcline occurred after 2010 but the peak abundances of  
497 *Ca. Methylomirabilis* were consistently observed within the redoxclines at 110 m, 100  
498 m and 95 m, respectively, representing up to 3.6% of total sequences in September  
499 2014, 5.4 % in June 2015 and 6.7% in November 2016. The steadily increased  
500 relative abundances of *Ca. Methylomirabilis* based on read numbers were further  
501 confirmed by qPCR (Fig. S8), demonstrating that water column stability was an  
502 important environmental factor for the growth of nitrite-dependent anaerobic  
503 methanotrophs. Further putative evidence is provided when comparing the two lake  
504 basins. The chemical conditions in the deep water column of the SB were conducive  
505 to nitrate/nitrite-dependent AOM (e.g., nitrate and nitrite concentrations up to 73 and  
506 3.9  $\mu\text{mol/L}$ , respectively, Fig. S4), but *Ca. Methylomirabilis* was not detected at all  
507 where nitrite-dependent AOM should be operative and was only found in the anoxic  
508 surface sediment. These observations suggest that the seasonal mixing regime with a  
509 stratified anoxic period of ~5 months (shorter than our estimated doubling time of ~6  
510 months, Fig. S9) did not support the development of stable populations of the slow-  
511 growing anaerobic methanotrophs and stable water column condition was a more  
512 critical factor than previously thought. In addition, ventilation of hypolimnetic waters  
513 in 2017 and 2018 resulted in a decline of the redoxcline and the strikingly decrease of  
514 the abundance of *Ca. Methylomirabilis* (Fig. 5). However, this oxygenation did not  
515 affect but appeared to stimulate the growth of *Methylococcaceae* above the redoxcline,  
516 indicating that they were most likely outcompeting the denitrify anaerobic  
517 methanotrophs that might be intolerant of high oxygen concentrations.

518 Based on the existing time-series data demonstrating the increasing relative  
519 importance of *Ca. Methylomirabilis* in the North Basin, we speculate that the

520 observed evolution reflects the slow dynamic recovery of the nitrite-dependent AOM  
521 community after the mixing events in 2005/2006. Episodic mixing and ventilation of  
522 hypolimnetic waters marks a significant ecological perturbation, which likely has  
523 detrimental effects particularly on this slow-growing anaerobic methanotrophic  
524 bacteria that require stable and low-redox environmental conditions (Luesken et al.  
525 2012). Once quasi-permanent anoxia under stably stratified conditions was restored,  
526 the population *Ca. Methyloirabilis* seemed to grow back in the deeper hypolimnion,  
527 and remained a permanent and important component of the water-column methane  
528 filter in the North Basin.

529

### 530 **Conclusions**

531 In this study, we have shown that nitrite-dependent AOM was an important  
532 methane sink in the permanently stratified North Basin of Lake Lugano and that this  
533 process was mediated by *Candidatus Methyloirabilis* below the redoxcline and in  
534 the anoxic water column. Time series data demonstrate that stable and low redox  
535 conditions in the meromictic North Basin are particularly conducive to the  
536 development of AOM-performing bacterial methanotrophs. In the more dynamic  
537 South Basin, the duration of seasonal stratification and anoxia is likely too short,  
538 relative to the slow growth rate of *Ca. Methyloirabilis*, to allow the establishment  
539 of a stable population, in spite of the favorable hydrochemical conditions with high  
540 dissolved nitrate/nitrite and methane concentrations. Our research on methanotrophy  
541 in the two connected but hydrodynamically differing lake basins highlights that the  
542 chemical conditions alone cannot fully determine which microorganisms will thrive  
543 and prevail in a system. Instead, physical processes such as water column  
544 dynamics/stability may be equally important, but often neglected, factors determining  
545 microbial community structures, and with that the modes and activity of  
546 biogeochemical processes. Our findings link water column stability and nitrite-  
547 dependent AOM within the stratified lake and have important implications for both  
548 anaerobic processes and the prediction of future methane emission under the scenarios  
549 of climate change.

550

551

552

## 553 **References**

- 554 Bastviken, D., J. Ejlertsson, and L. Tranvik. 2002. Measurement of methane oxidation in lakes: A  
555 comparison of methods. *Environ. Sci. Technol.* **36**: 3354–3361. doi:10.1021/es010311p
- 556 Bastviken, D., L. Tranvik, J. Downing, J. a Crill, P. M, and A. Enrich-prast. 2011. Freshwater methane  
557 emissions offset the continental carbon sink. *Science.* **331**: 50.
- 558 Beal, E. J., C. H. House, and V. J. Orphan. 2009. Manganese- and Iron-Dependent Marine Methane  
559 Oxidation. *Science.* **325**: 184–187. doi:10.1126/science.1169984
- 560 Bender, M., and R. Conrad. 1994. Methane oxidation activity in various soils and freshwater  
561 sediments: Occurrence, characteristics, vertical profiles, and distribution on grain size fractions.  
562 *J. Geophys. Res.* **99**: 16531. doi:10.1029/94JD00266
- 563 Biderre-Petit, C., D. Jézéquel, E. Dugat-Bony, and others. 2011. Identification of microbial  
564 communities involved in the methane cycle of a freshwater meromictic lake. *FEMS Microbiol.*  
565 *Ecol.* **77**: 533–545. doi:10.1111/j.1574-6941.2011.01134.x
- 566 Blees, J., H. Niemann, C. B. Wenk, and others. 2014a. Micro-aerobic bacterial methane oxidation in  
567 the chemocline and anoxic water column of deep south-Alpine Lake Lugano (Switzerland).  
568 *Limnol Ocean.* **59**: 311–324. doi:10.4319/lo.2014.59.2.0311
- 569 Blees, J., H. Niemann, C. B. Wenk, J. Zopfi, C. J. Schubert, J. S. Jenzer, M. Veronesi, and M. F.  
570 Lehmann. 2014b. Bacterial methanotrophs drive the formation of a seasonal anoxic benthic  
571 nepheloid layer in an alpine lake. *Limnol. Oceanogr.* **59**: 1410–1420.  
572 doi:10.4319/lo.2014.59.4.1410
- 573 Boetius, A., K. Ravenschlag, C. J. Schubert, and others. 2000. A marine microbial consortium  
574 apparently mediating anaerobic oxidation of methane. *Nature* **407**: 623–626.  
575 doi:10.1038/35036572
- 576 Bristow, L. A., T. Dalsgaard, L. Tiano, and others. 2016. Ammonium and nitrite oxidation at  
577 nanomolar oxygen concentrations in oxygen minimum zone waters. *Proc. Natl. Acad. Sci.* **113**:  
578 10601–10606. doi:10.1073/pnas.1600359113
- 579 Cai, C., A. O. Leu, G.-J. Xie, and others. 2018. A methanotrophic archaeon couples anaerobic  
580 oxidation of methane to Fe(III) reduction. *ISME J.* **12**: 1929–1939. doi:10.1038/s41396-018-  
581 0109-x
- 582 Cline, J. D. 1969. Spectrophotometric determination of hydrogen sulfide in natural waters. *Limnol.*  
583 *Oceanogr.* **14**: 454–458. doi:10.4319/lo.1969.14.3.0454
- 584 Deutzmann, J. S., and B. Schink. 2011. Anaerobic oxidation of methane in sediments of Lake  
585 Constance, an oligotrophic freshwater lake. *Appl Env. Microbiol* **77**: 4429–4436.  
586 doi:10.1128/AEM.00340-11
- 587 Deutzmann, J. S., P. Stief, J. Brandes, and B. Schink. 2014. Anaerobic methane oxidation coupled to  
588 denitrification is the dominant methane sink in a deep lake. *Proc. Natl. Acad. Sci.* **111**: 18273–  
589 18278. doi:10.1073/pnas.1411617111
- 590 Edgar, R. C. 2010. Search and clustering orders of magnitude faster than BLAST. *Bioinformatics* **26**:  
591 2460–2461. doi:10.1093/bioinformatics/btq461
- 592 Edgar, R. C. 2013. UPPARSE : highly accurate OTU sequences from microbial amplicon reads. *Nat.*

- 593           Methods **10**: 996–1000. doi:10.1038/nmeth.2604
- 594   Ettwig, K. F., T. Van Alen, K. T. Van De Pas-Schoonen, M. S. M. Jetten, and M. Strous. 2009.
- 595           Enrichment and molecular detection of denitrifying methanotrophic bacteria of the NC10
- 596           phylum. *Appl Env. Microbiol* **75**: 3656–3662. doi:10.1128/AEM.00067-09
- 597   Ettwig, K. F., M. K. Butler, D. Le Paslier, and others. 2010. Nitrite-driven anaerobic methane oxidation
- 598           by oxygenic bacteria. *Nature* **464**: 543–548. doi:10.1038/nature08883
- 599   Ettwig, K. F., B. Zhu, D. Speth, J. T. Keltjens, M. S. M. Jetten, and B. Kartal. 2016. Archaea catalyze
- 600           iron-dependent anaerobic oxidation of methane. *Proc. Natl. Acad. Sci.* **113**: 12792–12796.
- 601           doi:10.1073/pnas.1609534113
- 602   Frenzel, P., B. Thebrath, and R. Conrad. 1990. Oxidation of methane in the oxic surface layer of a deep
- 603           lake sediment (Lake Constance). *FEMS Microbiol. Lett.* **73**: 149–158. doi:10.1111/j.1574-
- 604           6968.1990.tb03935.x
- 605   Graf, J. S., M. J. Mayr, H. K. Marchant, and others. 2018. Bloom of a denitrifying methanotroph, “
- 606           Candidatus Methyloirabilis limnetica”, in a deep stratified lake. *Environ. Microbiol.* **20**: 2598–
- 607           2614. doi:10.1111/1462-2920.14285
- 608   Hanson, R. S., and T. E. Hanson. 1996. Methanotrophic Bacteria. *Microbiol Rev* **60**: 439–471.
- 609   Haroon, M. F., S. Hu, Y. Shi, M. Imelfort, J. Keller, P. Hugenholtz, Z. Yuan, and G. W. Tyson. 2013.
- 610           Anaerobic oxidation of methane coupled to nitrate reduction in a novel archaeal lineage. *Nature*
- 611           **500**: 567–70. doi:10.1038/nature12375
- 612   He, R., M. J. Wooller, J. W. Pohlman, J. Quensen, J. M. Tiedje, and M. B. Leigh. 2012. Diversity of
- 613           active aerobic methanotrophs along depth profiles of arctic and subarctic lake water column and
- 614           sediments. *ISME J.* **6**: 1937–1948. doi:10.1038/ismej.2012.34
- 615   He, Z., C. Cai, J. Wang, X. Xu, P. Zheng, M. S. M. Jetten, and B. Hu. 2016. A novel denitrifying
- 616           methanotroph of the NC10 phylum and its microcolony. *Sci. Rep.* **6**: 32241.
- 617           doi:10.1038/srep32241
- 618   Holzner, C. P., W. Aeschbach-Hertig, M. Simona, M. Veronesi, D. M. Imboden, and R. Kipfer. 2009.
- 619           Exceptional mixing events in meromictic Lake Lugano (Switzerland/Italy), studied using
- 620           environmental tracers. *Limnol. Oceanogr.* **54**: 1113–1124. doi:10.4319/lo.2009.54.4.1113
- 621   Hu, B. -I., L. -d. Shen, X. Lian, and others. 2014. Evidence for nitrite-dependent anaerobic methane
- 622           oxidation as a previously overlooked microbial methane sink in wetlands. *Proc. Natl. Acad. Sci.*
- 623           **111**: 4495–4500. doi:10.1073/pnas.1318393111
- 624   Hu, S., R. J. Zeng, L. C. Burow, P. Lant, J. Keller, and Z. Yuan. 2009. Enrichment of denitrifying
- 625           anaerobic methane oxidizing microorganisms. *Environ. Microbiol. Rep.* **1**: 377–384.
- 626           doi:10.1111/j.1758-2229.2009.00083.x
- 627   Kalyuzhnaya, M. G., S. Yang, O. N. Rozova, and others. 2013. Highly efficient methane biocatalysis
- 628           revealed in a methanotrophic bacterium. *Nat Commun* **4**: 1–7. doi:10.1038/ncomms3785
- 629   Kits, K. D., M. G. Klotz, and L. Y. Stein. 2015. Methane oxidation coupled to nitrate reduction under
- 630           hypoxia by the Gammaproteobacterium *Methylomonas denitrificans*, sp. nov. type strain FJG1.
- 631           *Environ. Microbiol.* **17**: 3219–3232. doi:10.1111/1462-2920.12772
- 632   Knittel, K., and A. Boetius. 2009. Anaerobic oxidation of methane: progress with an unknown process.

- 633 Annu. Rev. Microbiol. **63**: 311–334. doi:10.1146/annurev.micro.61.080706.093130
- 634 Kuivila, K. M., J. W. Murray, A. H. Devol, M. E. Lidstrom, and C. E. Reimers. 1988. Methane cycling  
635 in the sediments of Lake Washington. *Limnol. Oceanogr.* **33**: 571–581.  
636 doi:10.4319/lo.1988.33.4.0571
- 637 Kumar, S., G. Stecher, and K. Tamura. 2016. MEGA7: Molecular Evolutionary Genetics Analysis  
638 Version 7.0 for Bigger Datasets. *Mol. Biol. Evol.* **33**: 1870–1874. doi:10.1093/molbev/msw054
- 639 Kuypers, M. M. M., H. K. Marchant, and B. Kartal. 2018. The microbial nitrogen-cycling network.  
640 *Nat. Rev. Microbiol.* **16**: 263–276. doi:10.1038/nrmicro.2018.9
- 641 Lehmann, M. F., S. M. Bernasconi, J. A. McKenzie, A. Barbieri, M. Simona, and M. Veronesi. 2004.  
642 Seasonal variation of the  $\delta\text{C}$  and  $\delta\text{N}$  of particulate and dissolved carbon and nitrogen in Lake  
643 Lugano: Constraints on biogeochemical cycling in a eutrophic lake. *Limnol. Oceanogr.* **49**: 415–  
644 429. doi:10.4319/lo.2004.49.2.0415
- 645 Lehmann, M. F., M. Simona, S. Wyss, J. Blees, C. H. Frame, H. Niemann, M. Veronesi, and J. Zopfi.  
646 2015. Powering up the “biogeochemical engine”: the impact of exceptional ventilation of a deep  
647 meromictic lake on the lacustrine redox, nutrient, and methane balances. *Front. Earth Sci.* **3**: 1–  
648 13. doi:10.3389/feart.2015.00045
- 649 Lidstrom, M. E., and L. Somers. 1984. Seasonal study of methane oxidation in lake washington. *Appl*  
650 *Env. Microbiol.* **47**: 1255–1260.
- 651 Luesken, F. A., M. L. Wu, H. J. M. Op den Camp, J. T. Keltjens, H. Stunnenberg, K. J. Francoijs, M.  
652 Strous, and M. S. M. Jetten. 2012. Effect of oxygen on the anaerobic methanotroph “Candidatus  
653 *Methylomirabilis oxyfera*”: Kinetic and transcriptional analysis. *Environ. Microbiol.* **14**: 1024–  
654 1034. doi:10.1111/j.1462-2920.2011.02682.x
- 655 Magoč, T., and S. L. Salzberg. 2011. FLASH : fast length adjustment of short reads to improve genome  
656 assemblies. *Bioinformatics* **27**: 2957–2963. doi:10.1093/bioinformatics/btr507
- 657 Mau, S., J. Blees, E. Helmke, H. Niemann, and E. Damm. 2013. Vertical distribution of methane  
658 oxidation and methanotrophic response to elevated methane concentrations in stratified waters of  
659 the Arctic fjord Storfjorden (Svalbard, Norway). *Biogeosciences* **10**: 6267–6268. doi:10.5194/bg-  
660 10-6267-2013
- 661 Mayr, M. J., M. Zimmermann, C. Guggenheim, A. Brand, and H. Bürgmann. 2020. Niche partitioning  
662 of methane-oxidizing bacteria along the oxygen–methane counter gradient of stratified lakes.  
663 *ISME J.* **14**: 274–287. doi:10.1038/s41396-019-0515-8
- 664 McMurdie, P. J., and S. Holmes. 2013. Phyloseq: an R package for reproducible interactive analysis  
665 and graphics of microbiome census data. *PLoS One* **8**: 1–11. doi:10.1371/journal.pone.0061217
- 666 Michaelis, W., R. Seifert, K. Nauhaus, and others. 2002. Microbial reefs in the Black Sea fueled by  
667 anaerobic oxidation of methane. *Science.* **297**: 1013–1015. doi:10.1126/science.1072502
- 668 Milucka, J., M. Kirf, L. Lu, A. Krupke, P. Lam, S. Littmann, M. M. Kuypers, and C. J. Schubert. 2015.  
669 Methane oxidation coupled to oxygenic photosynthesis in anoxic waters. *ISME J.* **9**: 1991–2002.  
670 doi:10.1038/ismej.2015.12
- 671 Monchamp, M.-E., J.-C. Walser, F. Pomati, and P. Spaak. 2016. Sedimentary DNA reveals  
672 cyanobacteria community diversity over 200 years in two peri-alpine lakes. *Appl Env. Microbiol*

- 673           **82**: AEM.02174-16. doi:10.1128/AEM.02174-16
- 674 Niemann, H., T. Lösekann, D. de Beer, and others. 2006. Novel microbial communities of the Haakon  
675 Mosby mud volcano and their role as a methane sink. *Nature* **443**: 854–858.  
676 doi:10.1038/nature05227
- 677 Niemann, H., L. Steinle, J. Bleses, I. Bussmann, T. Treude, S. Krause, M. Elvert, and M. F. Lehmann.  
678 2015. Toxic effects of lab-grade butyl rubber stoppers on aerobic methane oxidation. *Limnol*  
679 *Ocean. Methods* **13**: 40–52. doi:10.1002/lom3.10005
- 680 Norði, K. Á., and B. Thamdrup. 2014. Nitrate-dependent anaerobic methane oxidation in a freshwater  
681 sediment. *Geochim. Cosmochim. Acta* **132**: 141–150. doi:10.1016/j.gca.2014.01.032
- 682 Norði, K. á., B. Thamdrup, and C. J. Schubert. 2013. Anaerobic oxidation of methane in an iron-rich  
683 Danish freshwater lake sediment. *Limnol. Oceanogr.* **58**: 546–554.  
684 doi:10.4319/lo.2013.58.2.0546
- 685 Orphan, V. J., C. H. House, K.-U. Hinrichs, K. D. McKeegan, and E. F. DeLong. 2002. Multiple  
686 archaeal groups mediate methane oxidation in anoxic cold seep sediments. *Proc. Natl. Acad. Sci.*  
687 **99**: 7663–7668. doi:10.1073/pnas.072210299
- 688 Oswald, K., J. S. Graf, S. Littmann, and others. 2017. Crenothrix are major methane consumers in  
689 stratified lakes. *ISME J.* **11**: 2124–2140. doi:10.1038/ismej.2017.77
- 690 Oswald, K., J. Milucka, A. Brand, P. Hach, S. Littmann, B. Wehrli, M. M. M. Kuypers, and C. J.  
691 Schubert. 2016. Aerobic gammaproteobacterial methanotrophs mitigate methane emissions from  
692 oxic and anoxic lake waters. *Limnol. Oceanogr.* **61**: S101–S118. doi:10.1002/lno.10312
- 693 Oswald, K., J. Milucka, A. Brand, S. Littmann, B. Wehrli, M. M. M. Kuypers, and C. J. Schubert.  
694 2015. Light-dependent aerobic methane oxidation reduces methane emissions from seasonally  
695 stratified lakes. *PLoS One* **10**: 1–22. doi:10.1371/journal.pone.0132574
- 696 Padilla, C. C., L. a Bristow, N. Sarode, and others. 2016. NC10 bacteria in marine oxygen minimum  
697 zones. *ISME J.* **10**: 2067–2071. doi:10.1038/ismej.2015.262
- 698 Parada, A. E., D. M. Needham, and J. A. Fuhrman. 2016. Every base matters: Assessing small subunit  
699 rRNA primers for marine microbiomes with mock communities, time series and global field  
700 samples. *Environ. Microbiol.* **18**: 1403–1414. doi:10.1111/1462-2920.13023
- 701 Pasche, N., M. Schmid, F. Vazquez, and others. 2011. Methane sources and sinks in Lake Kivu. *J.*  
702 *Geophys. Res. Biogeosciences* **116**: 1–16. doi:10.1029/2011JG001690
- 703 Quast, C., E. Pruesse, P. Yilmaz, J. Gerken, T. Schweer, P. Yarza, J. Peplies, and F. O. Glöckner. 2013.  
704 The SILVA ribosomal RNA gene database project : improved data processing and web-based  
705 tools. *Nucleic Acids Res.* **41**: 590–596. doi:10.1093/nar/gks1219
- 706 Raghoebarsing, A. a, A. Pol, K. T. van de Pas-Schoonen, and others. 2006. A microbial consortium  
707 couples anaerobic methane oxidation to denitrification. *Nature* **440**: 918–921.  
708 doi:10.1038/nature04617
- 709 Ritalahti, K. M., B. K. Amos, Y. Sung, Q. Wu, S. S. Koenigsberg, and F. E. Löffler. 2006. Quantitative  
710 PCR targeting 16S rRNA and reductive dehalogenase genes simultaneously monitors multiple  
711 Dehalococcoides strains. *Appl Env. Microbiol* **72**: 2765–2774. doi:10.1128/AEM.72.4.2765-  
712 2774.2006



- 713 Rudd, J. W. M., R. D. Hamilton, and N. E. R. Campbell. 1974. Measurement of microbial oxidation of  
714 methane in lake water. *Limnol. Oceanogr.* **19**: 519–524. doi:10.4319/lo.1974.19.3.0519
- 715 Scheller, S., H. Yu, G. L. Chadwick, S. E. McGlynn, and V. J. Orphan. 2016. Artificial electron  
716 acceptors decouple archaeal methane oxidation from sulfate reduction. *Science.* **351**: 1754–1756.  
717 doi:10.1126/science.aad7154
- 718 Schmieder, R., and R. Edwards. 2011. Quality control and preprocessing of metagenomic datasets.  
719 *Bioinformatics* **27**: 863–864. doi:10.1093/bioinformatics/btr026
- 720 Segarra, K. E. a., F. Schubotz, V. Samarkin, M. Y. Yoshinaga, K.-U. Hinrichs, and S. B. Joye. 2015.  
721 High rates of anaerobic methane oxidation in freshwater wetlands reduce potential atmospheric  
722 methane emissions. *Nat Commun* **6**: 1–8. doi:10.1038/ncomms8477
- 723 Sivan, O., M. Adler, A. Pearson, F. Gelman, I. Bar-Or, S. G. John, and W. Eckert. 2011. Geochemical  
724 evidence for iron-mediated anaerobic oxidation of methane. *Limnol. Oceanogr.* **56**: 1536–1544.  
725 doi:10.4319/lo.2011.56.4.1536
- 726 Steinle, L., C. a. Graves, T. Treude, and others. 2015. Water column methanotrophy controlled by a  
727 rapid oceanographic switch. *Nat. Geosci.* **8**: 378–382. doi:10.1038/ngeo2420
- 728 Steinle, L., M. Schmidt, L. Bryant, and others. 2016. Linked sediment and water-column  
729 methanotrophy at a man-made gas blowout in the North Sea: Implications for methane budgeting  
730 in seasonally stratified shallow seas. *Limnol. Oceanogr.* **61**: S367–S386. doi:10.1002/lno.10388
- 731 Stookey, L. L. 1970. Ferrozine-A New Spectrophotometric Reagent for Iron. *Anal. Chem.* **42**: 779–  
732 781. doi:10.1021/ac60289a016
- 733 Su, G., J. Zopfi, H. Yao, L. Steinle, H. Niemann, and M. F. Lehmann. 2020. Manganese/iron-  
734 supported sulfate-dependent anaerobic oxidation of methane by archaea in lake sediments.  
735 *Limnol. Oceanogr.* **65**: 863–875. doi:10.1002/lno.11354
- 736 Tamura, K., M. Nei, and S. Kumar. 2004. Prospects for inferring very large phylogenies by using the  
737 neighbor-joining method. *Proc. Natl. Acad. Sci.* **101**: 11030–11035.  
738 doi:10.1073/pnas.0404206101
- 739 Thamdrup, B., T. Dalsgaard, and N. P. Revsbech. 2012. Widespread functional anoxia in the oxygen  
740 minimum zone of the Eastern South Pacific. *Deep Sea Res. Part I Oceanogr. Res. Pap.* **65**: 36–  
741 45. doi:10.1016/j.dsr.2012.03.001
- 742 Valenzuela, E. I., K. A. Avendaño, N. Balagurusamy, S. Arriaga, C. Nieto-Delgado, F. Thalasso, and  
743 F. J. Cervantes. 2019. Electron shuttling mediated by humic substances fuels anaerobic methane  
744 oxidation and carbon burial in wetland sediments. *Sci. Total Environ.* **650**: 2674–2684.  
745 doi:10.1016/J.SCITOTENV.2018.09.388
- 746 Versantvoort, W., S. Guerrero-Cruz, D. R. Speth, and others. 2018. Comparative genomics of  
747 *Candidatus Methyloirabilis* species and description of *Ca. Methyloirabilis lanthanidiphila*.  
748 *Front. Microbiol.* **9**: 1–10. doi:10.3389/fmicb.2018.01672
- 749 Wang, Y., G. Zhu, H. R. Harhangi, B. Zhu, M. S. M. Jetten, C. Yin, and H. J. M. Op den Camp. 2012.  
750 Co-occurrence and distribution of nitrite-dependent anaerobic ammonium and methane-oxidizing  
751 bacteria in a paddy soil. *FEMS Microbiol. Lett.* **336**: 79–88. doi:10.1111/j.1574-  
752 6968.2012.02654.x



- 753 Weber, H. S., K. S. Habicht, and B. Thamdrup. 2017. Anaerobic methanotrophic archaea of the  
754 ANME-2d cluster are active in a low-sulfate, iron-rich freshwater sediment. *Front. Microbiol.* **8**:  
755 1–13. doi:10.3389/fmicb.2017.00619
- 756 Weiss, S., Z. Z. Xu, S. Peddada, and others. 2017. Normalization and microbial differential abundance  
757 strategies depend upon data characteristics. *Microbiome* **5**: 27. doi:10.1186/s40168-017-0237-y
- 758 Wenk, C. B., J. Bles, J. Zopfi, M. Veronesi, A. Bourbonnais, C. J. Schubert, H. Niemann, and M. F.  
759 Lehmann. 2013. Anaerobic ammonium oxidation (anammox) bacteria and sulfide-dependent  
760 denitrifiers coexist in the water column of a meromictic south-alpine lake. *Limnol. Oceanogr.* **58**:  
761 1–12. doi:10.4319/lo.2013.58.1.0001
- 762 Wilson, L. G., and R. S. Bandurski. 1958. Enzymatic reactions involving sulfate, sulfite, selenate and  
763 molybdate. *J. Biol. Chem.* **233**: 975–981.
- 764

765 FIGURES LEGENDS

766

767 **Figure 1.** Water column profiles of (A) oxygen (O<sub>2</sub>) and methane (CH<sub>4</sub>) concentrations, (B) nitrate and  
768 nitrite concentrations, and (C) methane oxidation rates (MOR) in the North Basin of Lake Lugano in  
769 November 2016. The grey area represents the redox transition zone (RTZ), starting at O<sub>2</sub> < 5 μM and  
770 reaching to the depth where sulfide rises above background concentrations. Error bars of MOR  
771 represent standard deviation (n = 3).

772

773 **Figure 2.** Water column profiles of (A) oxygen (O<sub>2</sub>) and methane (CH<sub>4</sub>) concentrations, (B) nitrate and  
774 nitrite concentrations and (C) methane oxidation rates (MOR) in the South Basin of Lake Lugano in  
775 November 2016. The grey area represents the RTZ. Error bars of MOR represent standard deviation (n  
776 = 3).

777

778 **Figure 3.** Effect of different electron acceptors on anaerobic methane oxidation (AOM) rates (n=3) in  
779 comparison to the control experiments (without addition of electron acceptors). The incubation was  
780 conducted with concentrated biomass collected in November 2016 from anoxic water layers in both  
781 NB and SB, and amended with <sup>14</sup>CH<sub>4</sub> and different oxidants (nitrate, nitrite, sulfate and molybdate). In  
782 the killed controls (n = 3), no tracer conversion was observed after 32 days.

783

784 **Figure 4.** Relative abundance (% of total sequences) of (A) *Methylococcaceae*, (B) *Crenothrix* and (C)  
785 *Ca. Methylomirabilis* in the water column of Lake Lugano South Basin in November 2016. Data are  
786 based on relative read abundances of 16S rRNA gene sequences. The RTZ (light grey) or surface  
787 sediment (0-2 cm, dark grey) is represented by the grey shaded area.

788

789 **Figure 5.** Time series data of *Ca. Methylomirabilis*, *Crenothrix* sp, and *Methylococcaceae* in the water  
790 column of Lake Lugano North Basin, starting three years after the exceptional mixing events in  
791 2005/2006. Data are based on relative read abundances of 16S rRNA gene sequences. Grey areas  
792 represent the location and extension of the RTZ for the different sampling dates.

793

794

795

Figure 1

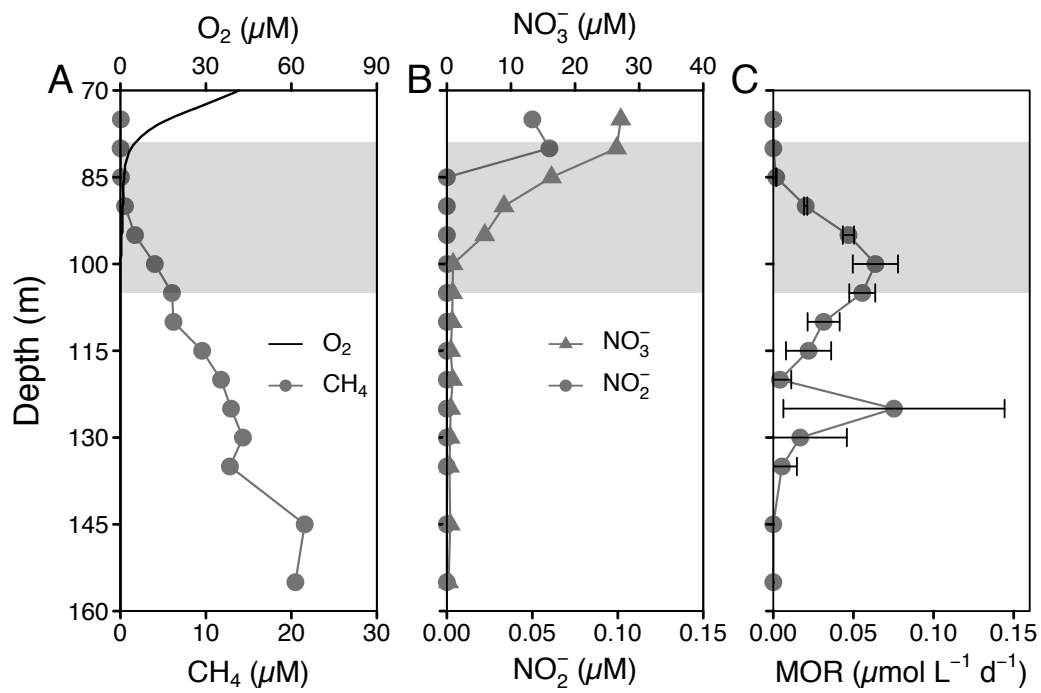

796

797

798

799

800

801

Figure 2

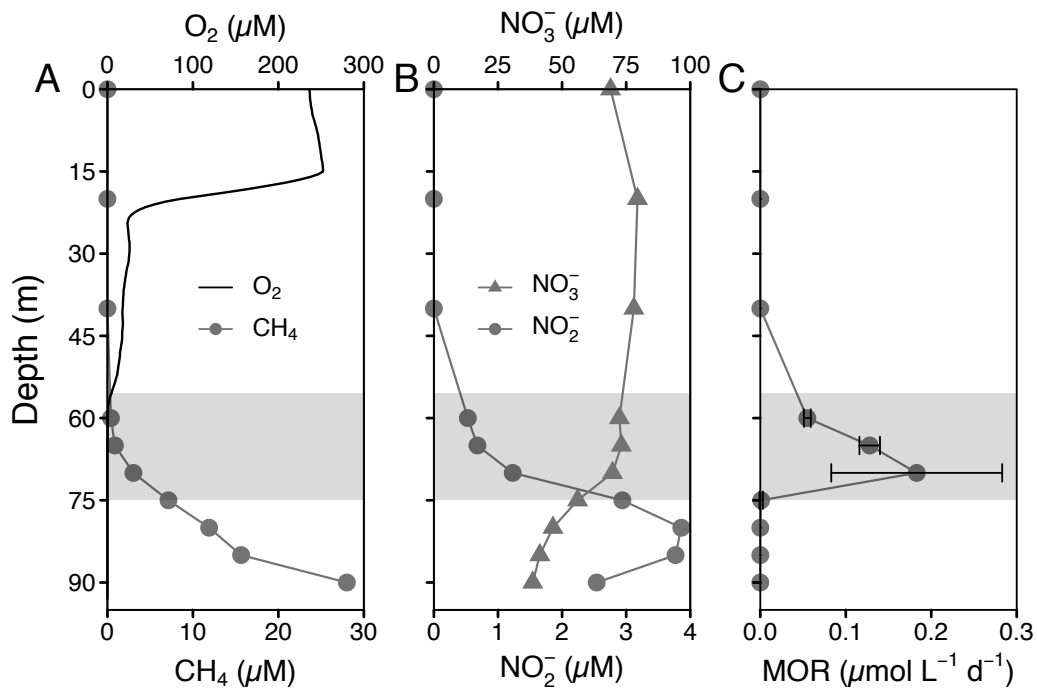

802

803

804

805

Figure 3

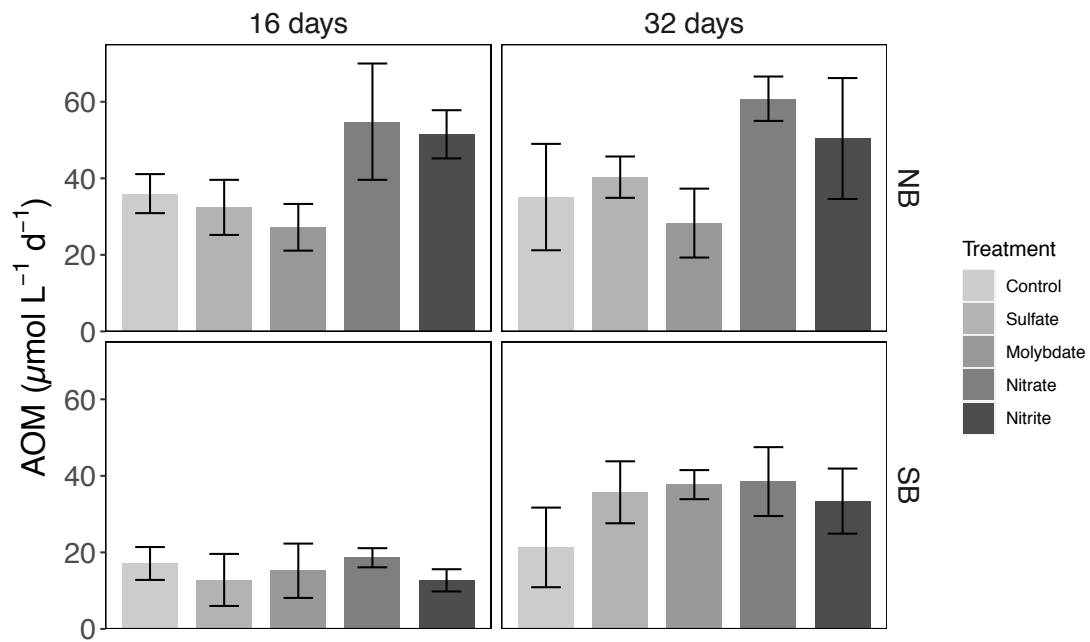

806

807

808

809

Figure 4

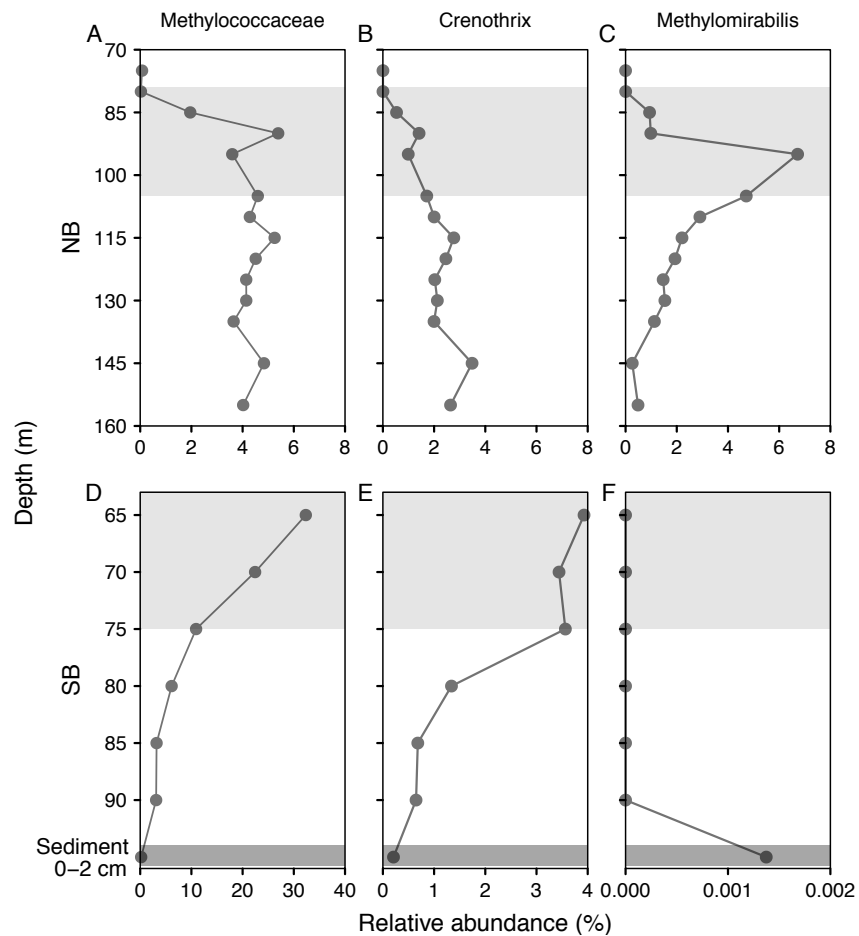

810

811

812 **Figure 5**

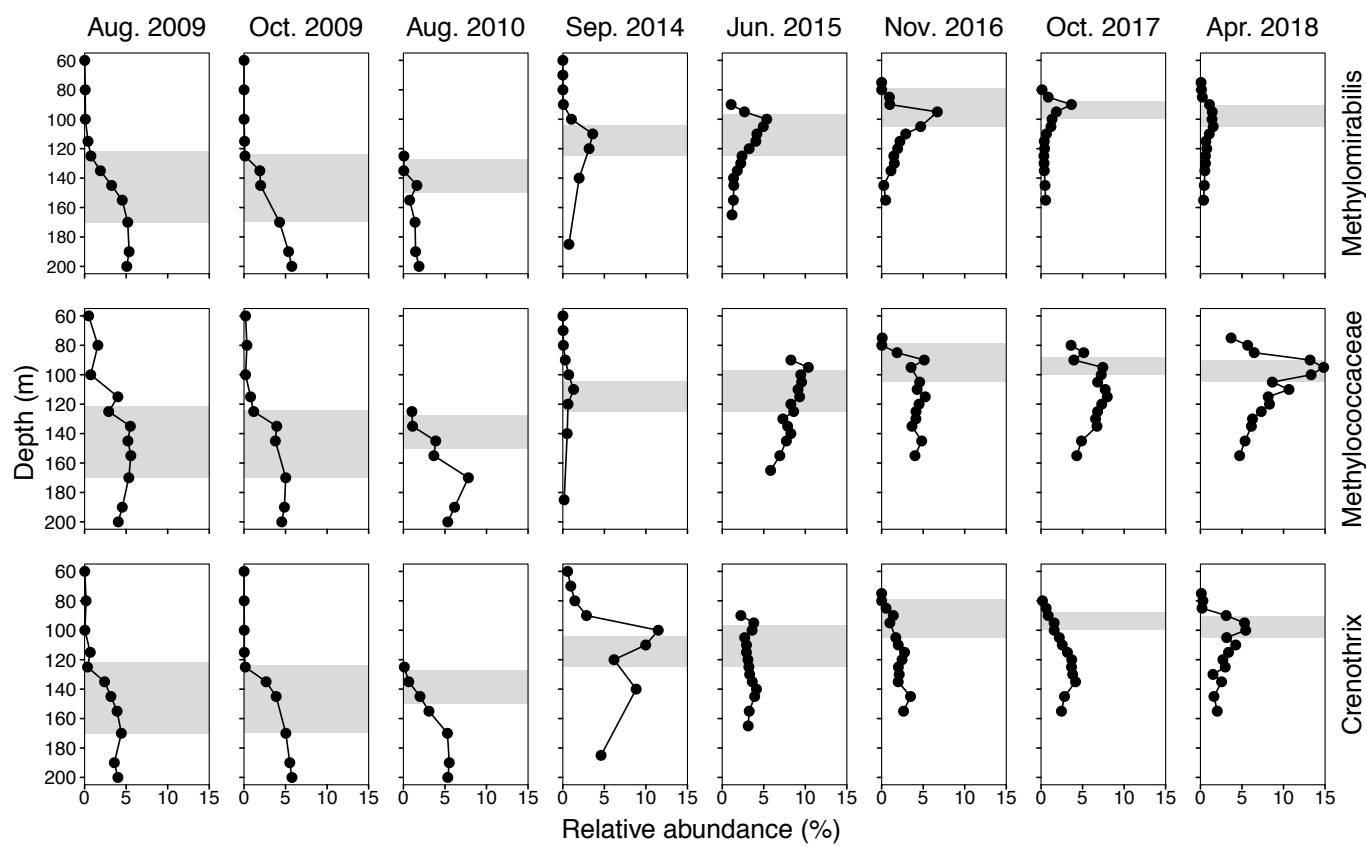

814

815

## Supporting Information

816

# 817 **Water column stability as an important factor controlling** 818 **nitrite-dependent anaerobic methane oxidation in stratified** 819 **lake basins**

820

821 Guangyi Su<sup>1\*</sup>, Moritz F. Lehmann<sup>1</sup>, Jana Tischer<sup>1</sup>, Yuki Weber<sup>1,2</sup>, Jean-Claude  
822 Walser<sup>3</sup>, Helge Niemann<sup>1,4</sup>, Jakob Zopfi<sup>1</sup>

823

824 <sup>1</sup> Department of Environmental Sciences, University of Basel, Basel, Switzerland

825 <sup>2</sup> Present address: Greenlight Biosciences Inc. Medford, MA, USA

826 <sup>3</sup> Genetic Diversity Centre (GDC), ETH Zürich, Zürich, Switzerland

827 <sup>4</sup> Present address: Department of Marine Microbiology and Biogeochemistry, NIOZ Royal Institute for  
828 Sea Research and Utrecht University, Texel, The Netherlands

829

830 \* Corresponding author: [guangyi.su@unibas.ch](mailto:guangyi.su@unibas.ch)

831

832

833

## 834 **Supplementary Methods**

835

### 836 **Library preparation**

837 The amplification conditions of the initial PCR during library generation are  
838 critical and can significantly affect results. Too few amplification cycles will limit the  
839 detection of low abundant taxa, too many will lead to PCR product saturation and to a  
840 biased representation of microbial community structures. In order to optimize our  
841 library preparation protocol, we evaluated the effect of two different amplification  
842 cycle numbers (18 vs. 25 cycles) for the initial PCR step, resulting in two libraries,  
843 which were sequenced in the same Illumina run.

844 The initial PCR consisted of 12.5  $\mu$ l of 2X KAPA HiFi Hot Start Ready Mix,  
845 0.75  $\mu$ l forward primer (10  $\mu$ M), 0.75  $\mu$ l reverse primer (10  $\mu$ M), 1  $\mu$ l of PCR grade  
846 water, and 10  $\mu$ l of template DNA (1 ng/ $\mu$ l). Four sets of 16S rRNA primers (Table  
847 S1) were used to amplify sample DNA. The primers contained 0-3 additional  
848 ambiguous bases between the adapter sequence and the PCR primer 515F-Y/926R  
849 (Parada et al. 2016) to increase the nucleotide diversity and improve template  
850 generation during Illumina sequencing. Increasing the nucleotide diversity at this  
851 stage allowed using a relatively low amount of PhiX (10%) during sequencing. PCR  
852 was run on a Biometra thermocycler using the following program: 98 °C for 3 min;  
853 cycles of 98 °C for 20 seconds, 55 °C for 15 seconds, and 72 °C for 15 seconds (18 or  
854 25 cycles, respectively); 72 °C for 5 minutes final elongation. Samples were then  
855 cleaned using AMPure Beads following the manufacturer's instructions. Nextera XT  
856 index primers (N7XX and S5XX; Illumina) were attached to the amplicons in a  
857 subsequent 25  $\mu$ l PCR reaction with: 12.5  $\mu$ l of 2X KAPA HiFi, 2.5  $\mu$ l each of  
858 Nextera XT index primer 1 and 2, 2.5  $\mu$ L of PCR water and 5  $\mu$ l of the cleaned  
859 amplicon run at 95 °C for 3 min; 8 cycles of 95 °C for 30 seconds, 55 °C for 30  
860 seconds, and 72 °C for 30 seconds; 72 °C for 5 minutes. Products were again cleaned  
861 using AMPure Beads and quality checked using Agilent Fragment analyzer (dsDNA-  
862 915 reagent kit), quantified using Qubit (ThermoFisher), normalized and finally  
863 pooled at equimolar quantities. Sequencing was done on a MiSeq system (Illumina)  
864 using the PE 300 method (V3 reagent kit) with 10% PhiX addition. Library  
865 preparation and sequencing was done at the Genomics Facility Basel (D-BSSE ETHZ



866 and Basel University). Raw sequence data are made available at NCBI under the  
867 BioProjectID PRJNA672280 with the accession numbers from SRR12936362 to  
868 SRR12936382.

869 Quality control of raw reads, initial sequence treatment, and taxonomic  
870 assignment is outlined in detail in the main manuscript. Sequencing results are  
871 summarized in Table S2. 16S rRNA sequence data were analyzed in R (v3.5.1) (R  
872 Core Team, 2014, <http://www.r-project.org/>) using mostly the libraries: phyloseq  
873 (McMurdie and Holmes 2013), vegan (Oksanen et al. 2013), ggplot2 (Wickham  
874 2009). Rarefaction curves show that 25 cycles yielded better estimates of the species  
875 richness than 18 cycles (Figure S1). ANOVA in R was used to test whether different  
876 alpha diversity measures (i.e., Observed richness, Chao1, Shannon and InvSimpson)  
877 were affected by either the sequencing depth or the amplification cycle number.  
878 Results show (Table S3) that Shannon and InvSimpson are significantly affected by  
879 the amplification cycle number, while others (e.g., Observed richness and Chao1)  
880 depend on the sampling depth (Weiss et al. 2017). Accordingly, samples were rarefied  
881 for alpha diversity estimates, or where the numbers operational taxonomical units  
882 (Z)OTUs in the two libraries were compared (Table S2). Principal coordinate analysis  
883 (PCoA) was performed after data were rarefied to the same depth. PCoA plots show  
884 that both 18 or 25 PCR amplification cycles yield very similar microbial community  
885 structure (Figure S3). Ultimately we choose 25 amplification cycles for the microbial  
886 community analysis, because of the higher sensitivity minor taxa. The sample  
887 G\_100m in the 25 cycle library was characterized by particularly low read and  
888 (Z)OTU numbers (Table S3), as well as an atypical community structure (Figure S2),  
889 suggesting that it was affected by an amplification artifact. It was therefore excluded  
890 from any further analysis.

891

892 **Supplementary tables**

893

894 **Table S1.** Design of the four different sets of forward and reverse primers used for  
 895 library preparation. The primers contained 0-3 additional ambiguous bases (indicated  
 896 in bold red) between the adapter sequence and the amplicon PCR primer 515F-  
 897 Y/926R (Parada et al. 2016) to increase the nucleotide diversity and improve template  
 898 generation during Illumina sequencing.

899

| Primer              |              | Sequence                                                                        |
|---------------------|--------------|---------------------------------------------------------------------------------|
| 515F-Y              |              | GTGYCAGCMGCCGCGGTAA                                                             |
| 926R                |              | CCGYCAATTYMTTTRAGTTT                                                            |
| Forward primer sets | 16S_Par0_fw  | 5'- TCGTCGGCAGCGTCAGATGTGTATAAAGAGACAG-GA-GTGYCAGCMGCCGCGGTAA-3'                |
|                     | 16S_Par1_fw  | 5'- TCGTCGGCAGCGTCAGATGTGTATAAAGAGACAG- <b>N</b> -GA-GTGYCAGCMGCCGCGGTAA-3'     |
|                     | 16S_Par2_fw  | 5'- TCGTCGGCAGCGTCAGATGTGTATAAAGAGACAG- <b>NN</b> -GA-GTGYCAGCMGCCGCGGTAA-3'    |
|                     | 16S_Par3_fw  | 5'- TCGTCGGCAGCGTCAGATGTGTATAAAGAGACAG- <b>NNN</b> -GA-GTGYCAGCMGCCGCGGTAA-3'   |
| Reverse primer sets | 16S_Par0_rev | 5'- GTCTCGTGGGCTCGGAGATGTGTATAAAGAGACAG-CA-CCGYCAATTYMTTTRAGTTT-3'              |
|                     | 16S_Par1_rev | 5'- GTCTCGTGGGCTCGGAGATGTGTATAAAGAGACAG- <b>N</b> -CA-CCGYCAATTYMTTTRAGTTT-3'   |
|                     | 16S_Par2_rev | 5'- GTCTCGTGGGCTCGGAGATGTGTATAAAGAGACAG- <b>NN</b> -CA-CCGYCAATTYMTTTRAGTTT-3'  |
|                     | 16S_Par3_rev | 5'- GTCTCGTGGGCTCGGAGATGTGTATAAAGAGACAG- <b>NNN</b> -CA-CCGYCAATTYMTTTRAGTTT-3' |

900

901

902 **Table S2.** Comparison of the Lake Lugano 16S rRNA gene sequence data of two  
 903 libraries prepared from the same original DNA, but with 18 and with 25 amplification  
 904 cycles, respectively. The two libraries were sequenced together in a single Illumina  
 905 run. Total reads and numbers of singletons (merged sequences occurring once in a  
 906 sample) are based on raw reads. Total numbers of OTUs (97% sequence similarity),  
 907 ZOTUs (zero-radius OTUs, i.e. amplicon sequence variants) and selected alpha  
 908 diversity measures were determined after rarefying to even sequencing depths.  
 909

| Cycles<br>Samples | Reads  |             | Singletons |           | OTU number |           | ZOTU number |           | Alpha diversity |           |         |            |            |             |
|-------------------|--------|-------------|------------|-----------|------------|-----------|-------------|-----------|-----------------|-----------|---------|------------|------------|-------------|
|                   | 18     | 25          | 18         | 25        | 18         | 25        | 18          | 25        | Chao1           |           | Shannon |            | InvSimpson |             |
| Fi_65m            | 38657  | 98914       | 359        | 351       | 370        | 367       | 473         | 489       | 519             | 594       | 3.6     | 3.5        | 11.5       | 10          |
| Fi_70m            | 34948  | 33400       | 328        | 343       | 357        | 401       | 461         | 538       | 539             | 563       | 3.5     | 4          | 9.6        | 16.5        |
| Fi_75m            | 29039  | 30049       | 340        | 410       | 369        | 404       | 483         | 513       | 526             | 705       | 4       | 4.1        | 21.6       | 27.8        |
| Fi_80m            | 27890  | 31947       | 383        | 479       | 407        | 442       | 530         | 589       | 617             | 739       | 4       | 4.2        | 18.6       | 23.3        |
| Fi_85m            | 52758  | 38723       | 478        | 484       | 400        | 442       | 532         | 591       | 667             | 816       | 3.6     | 4          | 10.9       | 15.6        |
| Fi_90m            | 56930  | 67764       | 580        | 724       | 470        | 538       | 630         | 733       | 834             | 838       | 4       | 4.3        | 16.6       | 23.9        |
| Ga_75m            | 31370  | 34607       | 225        | 292       | 329        | 384       | 465         | 547       | 464             | 548       | 3.2     | 3.9        | 5.1        | 11.7        |
| Ga_80m            | 39557  | 111195      | 250        | 303       | 330        | 336       | 459         | 486       | 447             | 483       | 3.1     | 3          | 4.9        | 4.5         |
| Ga_85m            | 32943  | 106091      | 322        | 467       | 416        | 420       | 567         | 540       | 598             | 617       | 4.1     | 3.8        | 24         | 14          |
| Ga_90m            | 31961  | 45567       | 345        | 406       | 435        | 464       | 566         | 571       | 670             | 707       | 3.9     | 4.1        | 15.3       | 19.6        |
| Ga_95m            | 23937  | 44800       | 295        | 426       | 432        | 474       | 568         | 629       | 622             | 696       | 3.8     | 4          | 16.3       | 20.5        |
| Ga_100m           | 15070  | <b>7160</b> | 289        | <b>10</b> | 382        | <b>62</b> | 489         | <b>72</b> | 525             | <b>67</b> | 3.4     | <b>3.3</b> | 7.4        | <b>20.2</b> |
| Ga_105m           | 16946  | 56802       | 296        | 517       | 410        | 491       | 506         | 621       | 593             | 751       | 3.6     | 4          | 10.2       | 17.2        |
| Ga_110m           | 16465  | 43192       | 334        | 535       | 472        | 515       | 596         | 656       | 688             | 846       | 3.8     | 4          | 12.8       | 16.6        |
| Ga_115m           | 15078  | 40146       | 312        | 531       | 422        | 560       | 558         | 730       | 600             | 1044      | 3.7     | 3.9        | 9.5        | 12.3        |
| Ga_120m           | 27477  | 62134       | 440        | 713       | 501        | 574       | 628         | 721       | 802             | 882       | 3.8     | 4.2        | 10.3       | 16.9        |
| Ga_125m           | 37707  | 39503       | 570        | 627       | 582        | 658       | 747         | 796       | 1043            | 1076      | 4       | 4.3        | 11.7       | 17.8        |
| Ga_130m           | 60645  | 35240       | 616        | 546       | 565        | 621       | 738         | 770       | 894             | 1036      | 3.9     | 4.3        | 9.7        | 16.9        |
| Ga_135m           | 37500  | 36390       | 611        | 609       | 620        | 645       | 782         | 799       | 1016            | 986       | 3.9     | 4.3        | 9          | 17          |
| Ga_145m           | 29141  | 38604       | 480        | 622       | 527        | 587       | 673         | 738       | 860             | 1001      | 3.5     | 3.8        | 6          | 9.1         |
| Ga_155m           | 25232  | 40902       | 499        | 668       | 572        | 609       | 716         | 811       | 779             | 942       | 3.7     | 4          | 7.2        | 9.6         |
| <b>Total</b>      | 681251 | 1043130     | 4518       | 5627      | 2284       | 2531      | 3267        | 3650      | –               | –         | –       | –          | –          | –           |

910

911 **Table S3.** ANOVA results showing the effects of experimental factors on different  
912 alpha diversity measures (Observed OTU richness, Chao1, Shannon and Inversed  
913 Simpson). The sequencing depth (i.e. read number per sample) had a significant effect  
914 (\*) on the observed richness and Chao1, whereas the PCR amplification cycle number  
915 used for library preparation significantly affected Shannon and InvSimpson.  
916

| Indices<br>Factors  | Observed              | Chao1                | Shannon              | InvSimpson            |
|---------------------|-----------------------|----------------------|----------------------|-----------------------|
| Sequencing<br>depth | F=11.68,<br>p=0.001 * | F=6.26,<br>p=0.017 * | F=0.04,<br>p=0.844   | F=0.463,<br>p=0.500   |
| Cycle number        | F=1.36,<br>p=0.251    | F=1.79,<br>p=0.188   | F=8.46,<br>p=0.006 * | F=10.71,<br>p=0.002 * |

917

918

919 **Table S4.** t-Test results for differences in AOM rates (n = 3) in incubations prepared  
 920 with North (NB) and South Basin (SB) water and amendments of different potential  
 921 oxidants. After 16 and 32 days of incubations, rates were tested against the live  
 922 control and the incubation with added sulfate. The significance level  $\alpha$  set at 0.05 and  
 923 p-values are given in parentheses. NS: not significant.

924

| Site | Treatment | 16 days               |                       | 32 days               |                       |
|------|-----------|-----------------------|-----------------------|-----------------------|-----------------------|
|      |           | Difference to control | Difference to sulfate | Difference to control | Difference to sulfate |
| NB   | Nitrate   | NS                    | > (0.05)              | NS                    | > (0.005)             |
|      | Nitrite   | > (0.02)              | > (0.01)              | NS                    | NS                    |
|      | Molybdate | NS                    | NS                    | NS                    | NS                    |
|      | Sulfate   | NS                    | –                     | NS                    | –                     |
|      | Control   | –                     | –                     | –                     | –                     |
| SB   | Nitrate   | NS                    | NS                    | > (0.05)              | NS                    |
|      | Nitrite   | NS                    | NS                    | NS                    | NS                    |
|      | Molybdate | NS                    | NS                    | > (0.05)              | NS                    |
|      | Sulfate   | NS                    | –                     | NS                    | –                     |
|      | Control   | –                     | –                     | –                     | –                     |

925

926

927 **Supplementary figures**

928

929

930

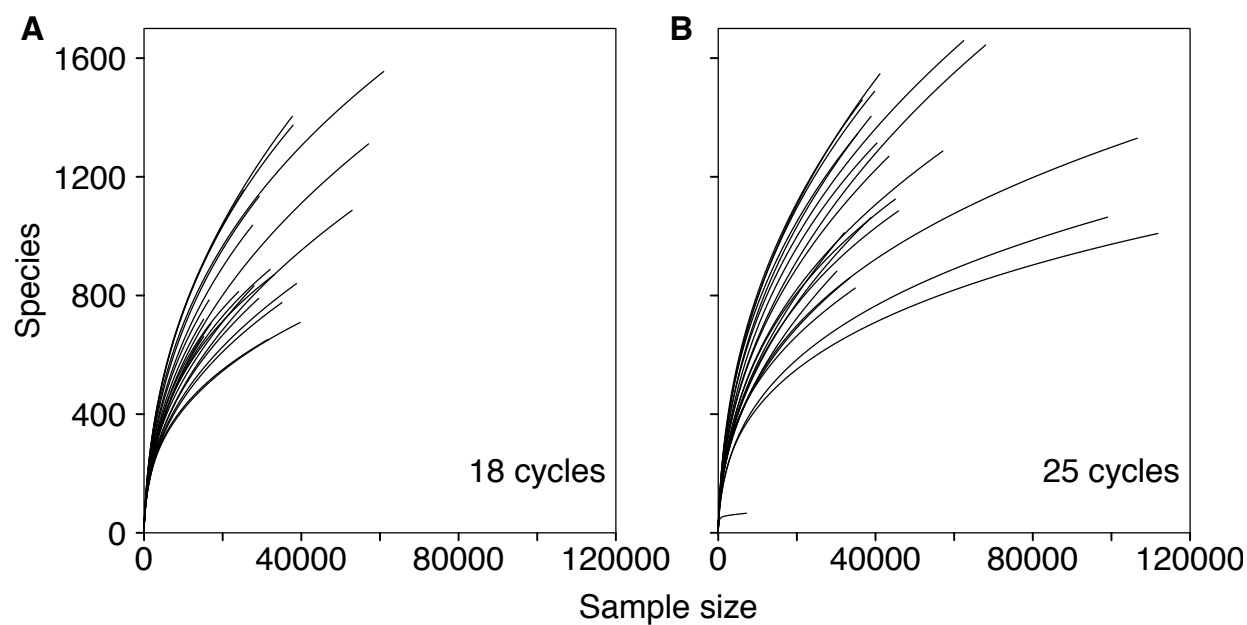

931

932

933 **Figure S1.** Rarefaction curves of samples from libraries generated with different PCR

934 amplification cycles: (A) 18 cycles and (B) 25 cycles. Each curve represents one

935 sample, showing the cumulative number of new OTUs (“Species”) in a given number

936 of sampled sequences (“Sample size”).

937

938

939

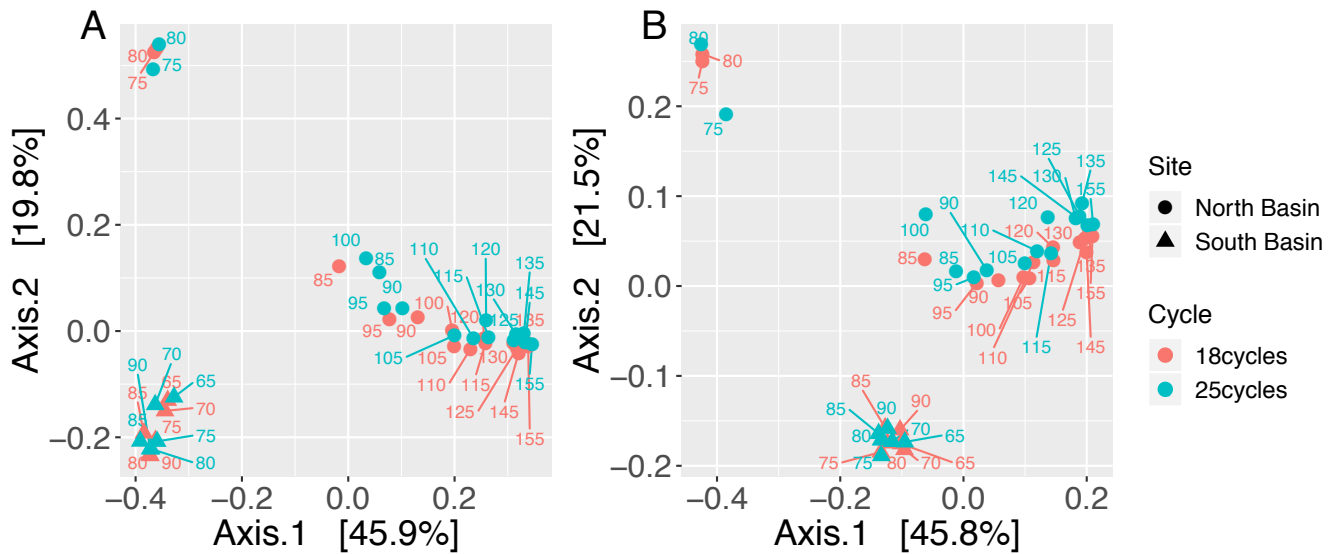

941

942 **Figure S2.** Principal coordinate analysis (PCoA) of microbial community structures  
943 in samples of the two basins (North Basin and South Basin) in Lake Lugano with two  
944 different PCR amplification cycle numbers (18 cycles and 25 cycles). Plots of PCoA  
945 on (A) Bray-Curtis and (B) weighted UniFrac distances revealed an atypical  
946 community structure for one of the samples (Ga\_100 m, 25 cycles), possibly caused  
947 by a PCR amplification artifact. The x- and y-axes are indicated by the first and  
948 second coordinates, respectively, and the values in square brackets show the  
949 percentages of the community variation explained.



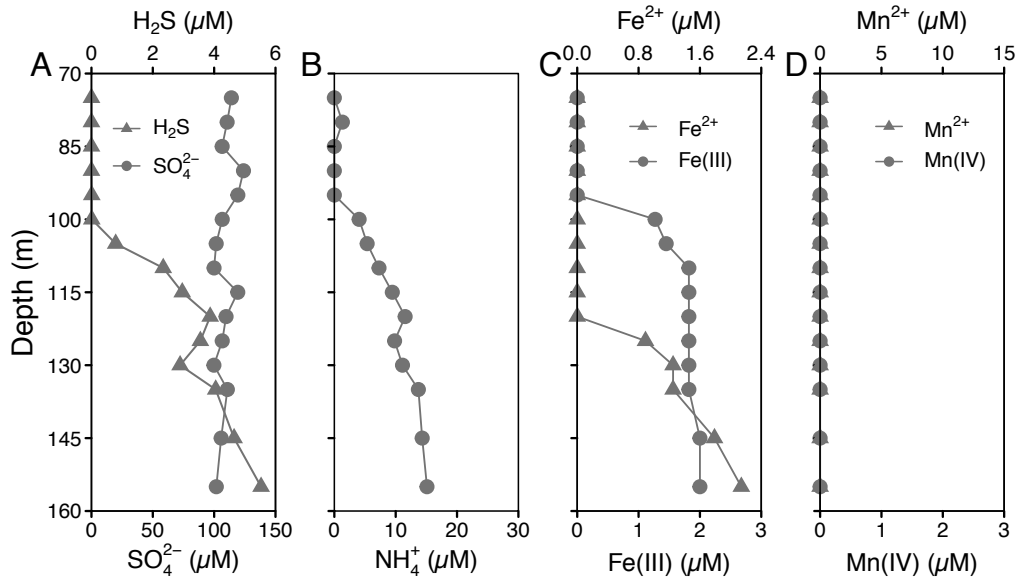

950

951

952 **Figure S3.** Concentration profiles of (A) sulfur species (sulfate and sulfide), (B)

953 ammonium, (C) iron species and (D) manganese species in the water column of the

954 permanently stratified North Basin of Lake Lugano in November 2016. Manganese

955 species (both Mn<sup>2+</sup> and Mn(IV)) were below detection limit throughout the

956 investigated depths).

957

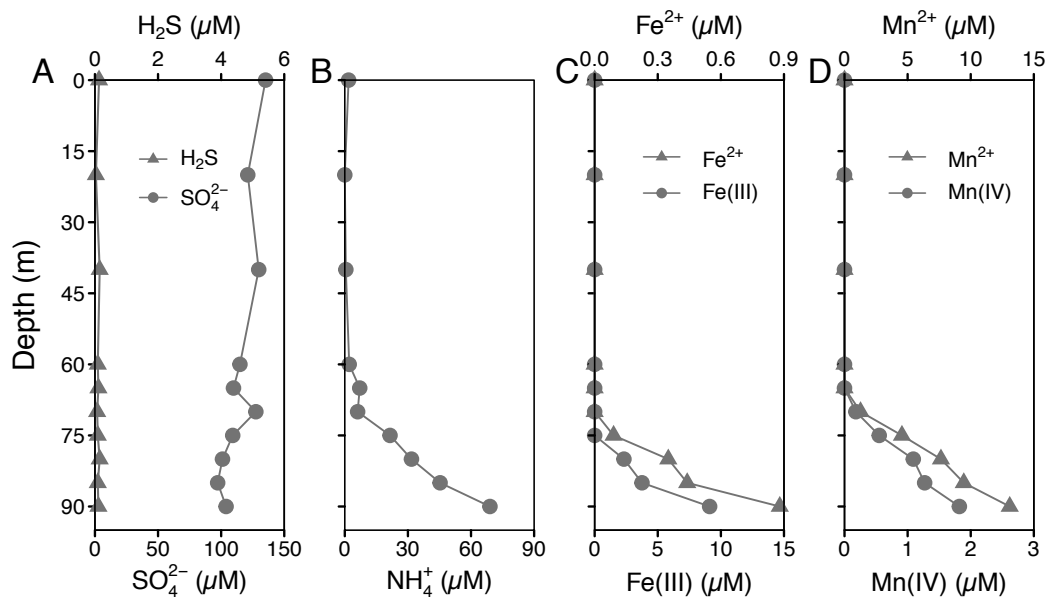

958

959

960 **Figure S4.** Concentration profiles of (A) sulfur species (sulfate and sulfide), (B)

961 ammonium, (C) iron species and (D) manganese species in the water column of the

962 seasonally stratified South Basin of Lake Lugano in November 2016.

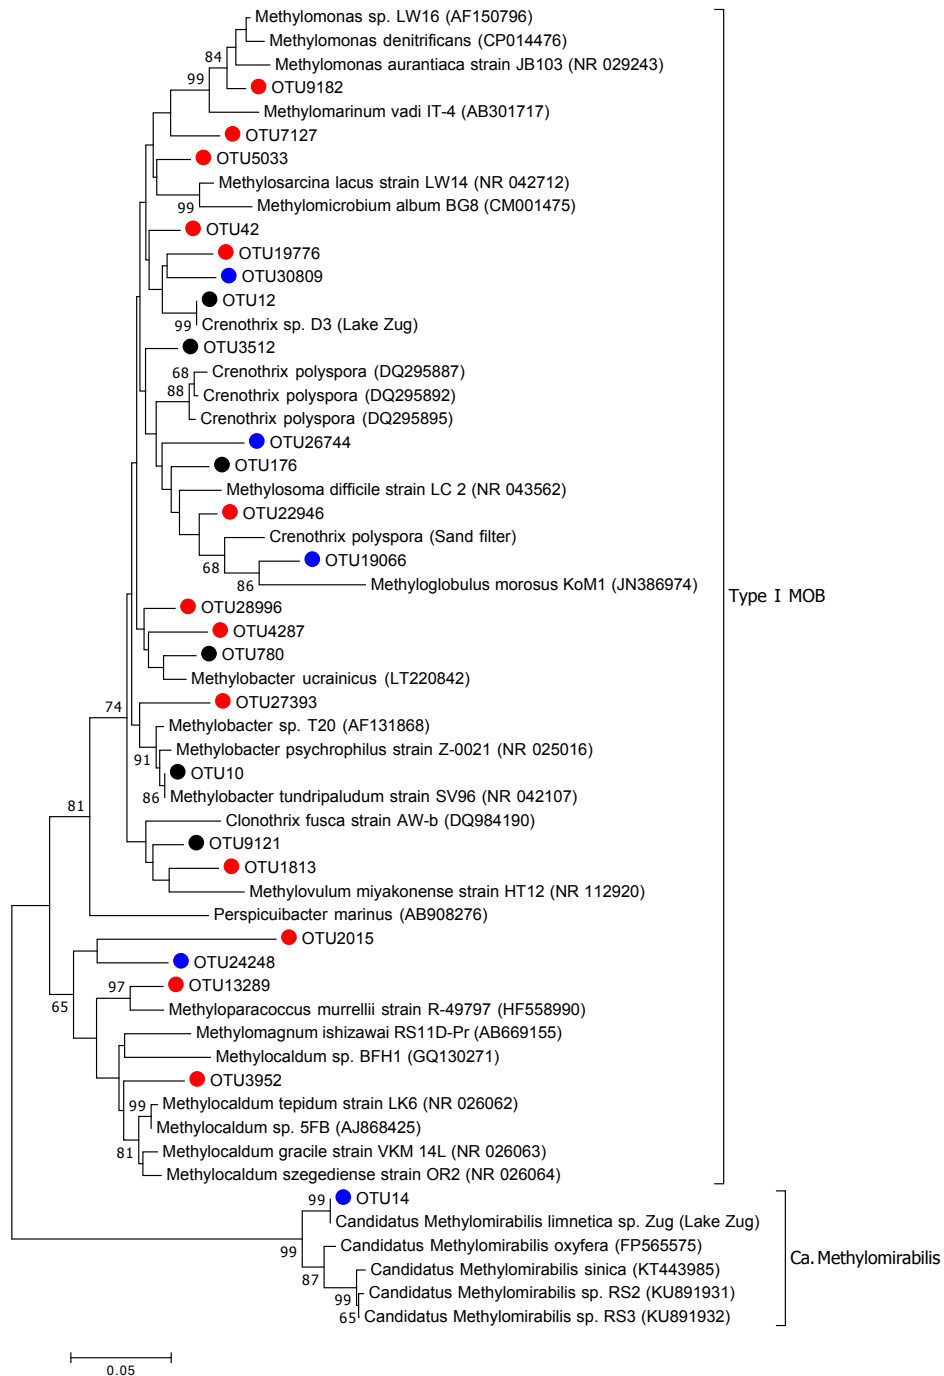

963

964

965 **Figure S5.** Neighbor-joining phylogenetic tree of 16S rRNA genes of both  
966 *Methylococcaceae* sp. and *Candidatus Methyloirabilis* detected in the South Basin  
967 (red bullets), in the North Basin (blue), and in both basins (black) where methane  
968 oxidation occurred. The tree was constructed using Maximum Composite Likelihood  
969 correction and partial gap deletion (Kumar et al. 2016), with a site coverage cutoff of  
970 95%. Bootstrap values (> 65%) based on 1000 resampling are indicated at each node.  
971 Scale bar represents 5% of sequence divergence.

972

973

974

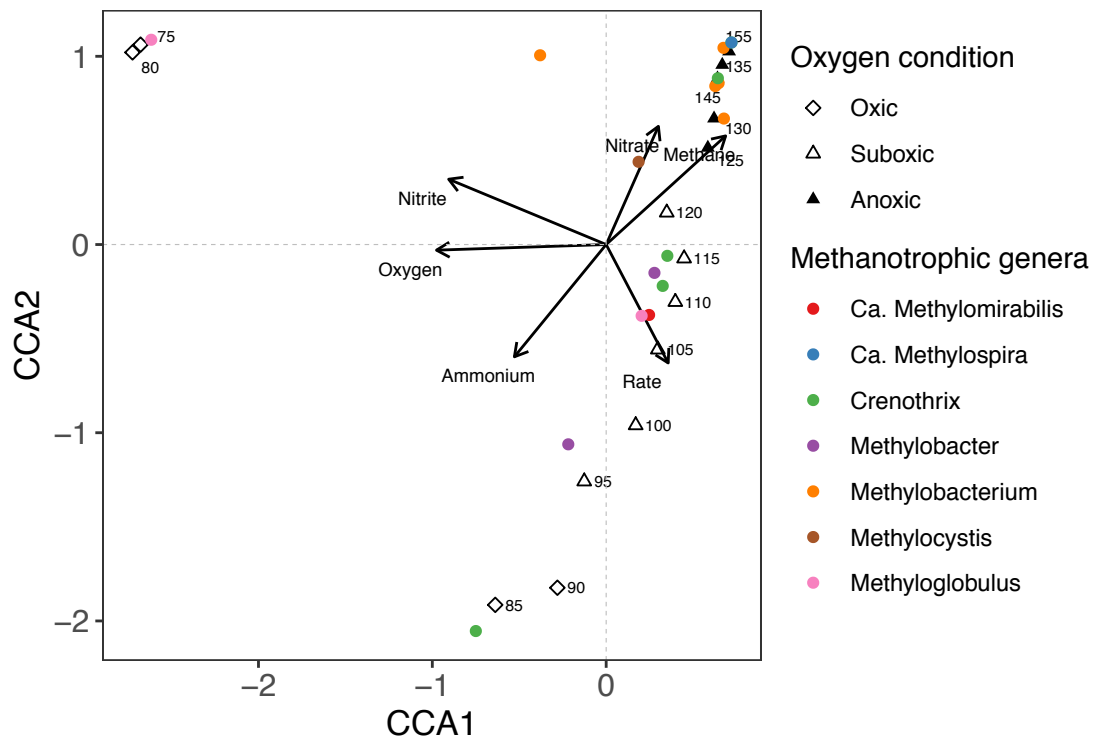

975

976

977 **Figure S6.** Canonical correspondence analysis (CCA) based on nutrient  
978 concentrations, AOM rate measurements, and potential methanotrophs detected in the  
979 North Basin of Lake Lugano. Triangles and diamonds represent samples in this basin  
980 under different oxygen conditions (with numbers indicating the water depths).  
981 Ordination was performed on the sequence data using Bray-Curtis distance. Taxa  
982 abundance and environmental variables (concentrations and rates) were Hellinger  
983 transformed prior to ordination. The CCA triplot shows that *Ca. Methylospiras*  
984 (red filled circle) is found in the suboxic water column of the permanently stratified  
985 North Basin (open triangles), and is positively correlated to the methane oxidation  
986 rate. Interestingly, the plot also shows that *Ca. Methylospiras* is anti-correlated to  
987 nitrite, suggesting that this taxon may be responsible for the depletion of the  
988 nitrite/nitrate pool in the habitat. Arrows represent solute concentrations, with  
989 arrowheads indicating their direction of increase.

990

991

992

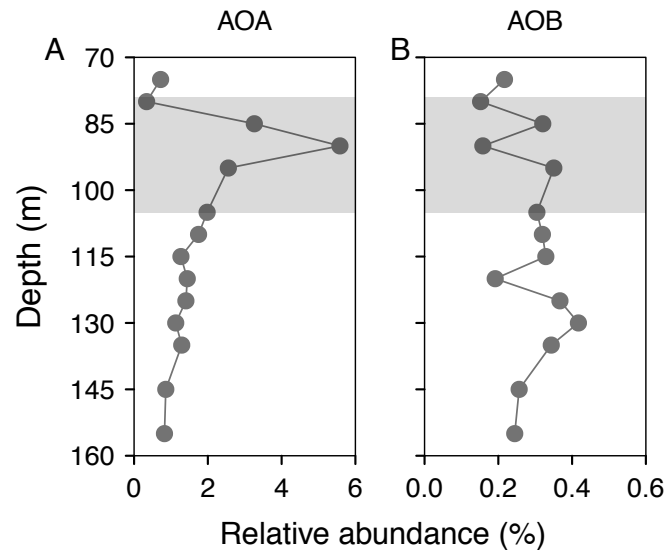

993

994

995 **Figure S7.** Depth profiles of relative abundances of (A) ammonium-oxidizing archaea  
996 (AOA, *Ca. Nitrosopumilus* and *Ca. Nitrosoarchaeum*), (B) ammonium-oxidizing  
997 bacteria (AOB, *Nitrosomonas* and *Nitrospira*) across and below the redoxcline  
998 (indicated with grey) of the Lake Lugano North Basin in November 2016. Data are  
999 based on relative read abundances of 16S rRNA gene sequences.

1000

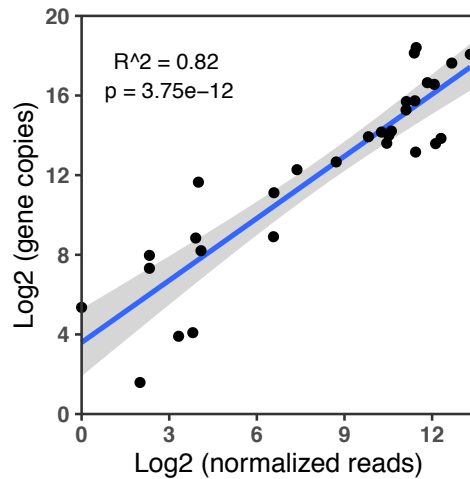

1001

1002 **Figure S8.** Relationship between 16S rRNA gene copy numbers and the normalized  
1003 read numbers (to a same sequencing depth) of 16S rRNA gene sequences of *Ca.*  
1004 *Methyloirabilis* in the North Basin water column. Samples are from October 2010,  
1005 September 2014 and November 2016.

1006

1007

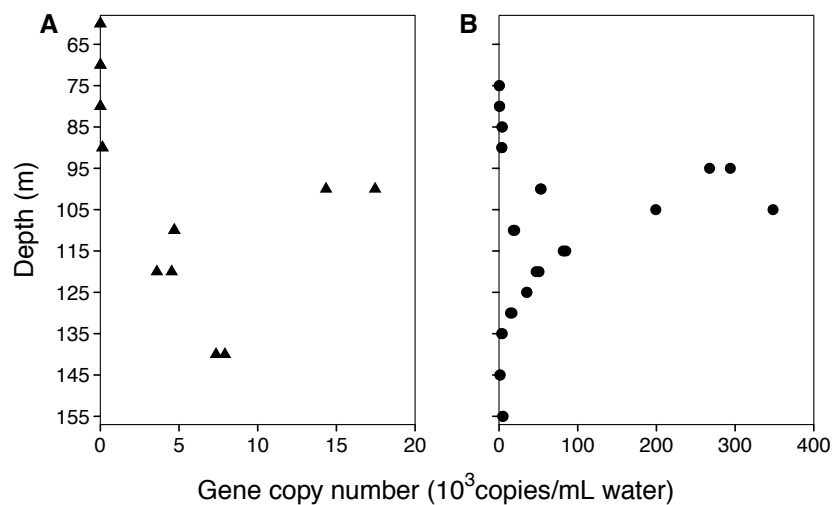

1008

1009

1010 **Figure S9.** Depth profiles of 16S rRNA gene copy numbers of *Ca. Methyloirabilis*  
1011 in the water column of the permanently stratified North Basin of Lake Lugano in (A)  
1012 September 2014 and (B) November 2016. The redoxcline was located between 104  
1013 and 125 m in 2014, and between 79 and 105 m in 2016. Based on qPCR data (i.e., the  
1014 local maximum gene copy numbers between the two years), the estimated apparent  
1015 doubling time of *Ca. Methyloirabilis* was approximately 6 months, longer than the  
1016 anoxic stratification period of ~5 months in the South Basin.

1017

## 1018 **References**

- 1019 Kumar, S., G. Stecher, and K. Tamura. 2016. MEGA7: molecular evolutionary  
1020 genetics analysis version 7.0 for bigger datasets. *Mol. Biol. Evol.* **33**: 1870–  
1021 1874. doi:10.1093/molbev/msw054
- 1022 McMurdie, P. J., and S. Holmes. 2013. Phyloseq: an R package for reproducible  
1023 interactive analysis and graphics of microbiome census data. *PLoS One* **8**: 1–11.  
1024 doi:10.1371/journal.pone.0061217
- 1025 Oksanen, J., F. G. Blanchet, R. Kindt, and others. 2013. *Vegan: community ecology*  
1026 package. R Packag. version.
- 1027 Parada, A. E., D. M. Needham, and J. A. Fuhrman. 2016. Every base matters:  
1028 Assessing small subunit rRNA primers for marine microbiomes with mock  
1029 communities, time series and global field samples. *Environ. Microbiol.* **18**:  
1030 1403–1414. doi:10.1111/1462-2920.13023
- 1031 Weiss, S., Z. Z. Xu, S. Peddada, and others. 2017. Normalization and microbial  
1032 differential abundance strategies depend upon data characteristics. *Microbiome*  
1033 **5**: 27. doi:10.1186/s40168-017-0237-y
- 1034 Wickham, H. 2009. *ggplot2: elegant graphics for data analysis.*, Springer.  
1035
